ARTICLE

1  
2  
3  
4  
5  
6  
7  
8  
9  
10  
11  
12  
13  
14  
15  
16  
17  
18  
19

**Evolution of a cytoplasmic determinant: evidence for the biochemical basis of functional evolution of a novel germ line regulator**

Leo Blondel<sup>1</sup>, Savandara Besse<sup>1,2</sup> and Cassandra G. Extavour<sup>1,3</sup>

1. Department of Molecular and Cellular Biology, Harvard University, Cambridge MA, USA
2. Current address: Department of Biochemistry and Molecular Medicine, Université de Montréal, Montréal Québec, Canada
3. Department of Organismic and Evolutionary Biology, Harvard University, Cambridge MA, USA

Corresponding author: Cassandra G. Extavour [extavour@oeb.harvard.edu](mailto:extavour@oeb.harvard.edu)

20 **Abstract**

21 Germ line specification is essential in sexually reproducing organisms. Despite their  
22 critical role, the evolutionary history of the genes that specify animal germ cells is  
23 heterogeneous and dynamic. In many insects, the gene *oskar* is required for the  
24 specification of the germ line. However, the germ line role of *oskar* is thought to be a  
25 derived role resulting from co-option from an ancestral somatic role. To address how  
26 evolutionary changes in protein sequence could have led to changes in the function of  
27 Oskar protein that enabled it to regulate germ line specification, we searched for *oskar*  
28 orthologs in 1565 publicly available insect genomic and transcriptomic datasets. The  
29 earliest-diverging lineage in which we identified an *oskar* ortholog was the order  
30 Zygentoma (silverfish and firebrats), suggesting that *oskar* originated before the origin of  
31 winged insects. We noted some order-specific trends in *oskar* sequence evolution,  
32 including whole gene duplications, clade-specific losses, and rapid divergence. An  
33 alignment of all known 379 Oskar sequences revealed new highly conserved residues as  
34 candidates that promote dimerization of the LOTUS domain. Moreover, we identified  
35 regions of the OSK domain with conserved predicted RNA binding potential. Furthermore,  
36 we show that despite a low overall amino acid conservation, the LOTUS domain shows  
37 higher conservation of predicted secondary structure than the OSK domain. Finally, we  
38 suggest new key amino acids in the LOTUS domain that may be involved in the previously  
39 reported Oskar-Vasa physical interaction that is required for its germ line role.

40

41 **Keywords:** *oskar*, *vasa*. Drosophila, germ plasm, germ cell, LOTUS domain, RNA  
42 binding, Hidden Markov Models, Hymenoptera, Lepidoptera, Zygentoma

43

## 44 Introduction

45 With the evolution of obligate multicellularity, many organisms faced a challenge  
46 considered a major evolutionary transition: allocating only some cells (germ line) to pass  
47 on their genetic material to the next generation, relegating the remainder (soma) to death  
48 upon death of the organism (reviewed in (Kirk 2005)). This is soma-germ line  
49 differentiation, where only cells from the germ line will create the next generation  
50 (reviewed in (Kirk 2005)). While there are multiple mechanisms of germ cell specification,  
51 they can be grouped into two broad categories, induction or inheritance (reviewed in  
52 (Extavour and Akam 2003)). Under induction, cells respond to an external signal by  
53 adopting germ cell fate. Under the inheritance mechanism, maternally synthesized  
54 cytoplasmic molecules, collectively called germ plasm, are deposited in the oocyte and  
55 “inherited” by a subset of cells during early embryonic divisions. Cells inheriting these  
56 molecules commit to a germ line fate (reviewed in (Extavour and Akam 2003)).

57

58 The inheritance mechanism in insects that undergo metamorphosis (Holometabola)  
59 appears to have evolved by co-option of a key gene, *oskar*. *oskar* was first identified in  
60 forward genetic screens for axial patterning mutants in *Drosophila melanogaster*  
61 (Lehmann and Nüsslein-Volhard 1986). For the first 20 years following its discovery,  
62 *oskar* appeared to be restricted to Drosophilids (Clark, et al. 2007). Its later discovery in  
63 the mosquitoes *Aedes aegypti*, *Anopheles gambiae* and *Culex quinquefasciatus* (Juhn  
64 and James 2006; Juhn, et al. 2008) and the wasp *Nasonia vitripennis* (Lynch, et al. 2011)  
65 suggested the hypothesis that *oskar* emerged at the base of the Holometabola, and  
66 facilitated the evolution of germ plasm in these insects (Lynch, et al. 2011). However, our  
67 subsequent identification of *oskar* orthologs in the cricket *Gryllus bimaculatus* (Ewen-  
68 Campen, et al. 2012), and in many additional hemimetabolous insect species (Blondel,  
69 et al. 2020), demonstrated that *oskar* predates the Holometabola, and must be at least  
70 as old as the major radiation of insects (Misof, et al. 2014). Two secondary losses of *oskar*  
71 from insect genomes have also been reported, in the beetle *Tribolium castaneum* (Lynch,  
72 et al. 2011) and the honeybee *Apis mellifera* (Dearden, et al. 2006), and neither of these  
73 insects appear to use germ plasm to establish their germ lines (Nelson 1915; Nagy, et al.  
74 1994; Dearden 2006; Schroder 2006). Whether *oskar* is ubiquitous across all insect

75 orders, whether it is truly unique to insects, the evidence for or against potential losses or  
76 duplications of the *oskar* locus across insects, and the evolutionary dynamics of the locus,  
77 remain unknown.

78  
79 *oskar* remains, to our knowledge, the only gene that has been experimentally  
80 demonstrated to be both necessary and sufficient to induce the formation of functional  
81 primordial germ cells (Kim-Ha, et al. 1991; Ephrussi and Lehmann 1992). Thus, in *D.*  
82 *melanogaster* (Lehmann and Nüsslein-Volhard 1986; Kim-Ha, et al. 1991; Ephrussi and  
83 Lehmann 1992) and potentially more broadly in holometabolous insects with germ plasm  
84 (Lynch, et al. 2011; Rafiqi, et al. 2020), *oskar* plays an essential germ line role. However,  
85 it is clear that *oskar*'s germ line function can evolve rapidly, as even within the genus  
86 *Drosophila*, *oskar* orthologs from different species cannot always substitute for each other  
87 (Webster, et al. 1994; Jones and Macdonald 2007). Moreover, the ancestral function of  
88 this gene may have been in the nervous system rather than the germ line (Ewen-Campen,  
89 et al. 2012). The current hypothesis is therefore that it was co-opted to play a key role in  
90 the acquisition of an inheritance-based germ line specification mechanism approximately  
91 300 million years ago (Misof, et al. 2014), in the lineage leading to the Holometabola  
92 (Ewen-Campen, et al. 2012). Thus, the case of *oskar* offers an opportunity to study the  
93 evolution of protein function at multiple levels of biological organization, from the genesis  
94 of a novel protein, through to potential co-option events and the evolution of functional  
95 variation.

96  
97 Neofunctionalization often correlates with a change in the fitness landscape of the protein  
98 sequence caused by novel biochemical constraints imposed by amino acid sequence  
99 changes (Sikosek, et al. 2012; Sikosek and Chan 2014). Such potential constraints may  
100 be revealed by analyzing the conservation of amino acids, their chemical properties, or  
101 structure at the secondary, tertiary or quaternary levels (Sikosek and Chan 2014). *Oskar*  
102 has two well-structured domains conserved across identified orthologs to date (Blondel,  
103 et al. 2020): an N-terminal Helix Turn Helix (HTH) domain termed LOTUS with potential  
104 RNA binding properties (Anantharaman, et al. 2010; Jeske, et al. 2015; Yang, et al. 2015;  
105 Jeske, et al. 2017), and a C-terminal GDSL-lipase-like domain called OSK (Jeske, et al.

106 2015; Yang, et al. 2015) (Figure 1). These two domains are linked by an unstructured  
107 highly variable interdomain sequence (Ahuja and Extavour 2014; Jeske, et al. 2015;  
108 Yang, et al. 2015). We previously showed that this domain structure is likely the result of  
109 a horizontal transfer event of a bacterial GDSL-lipase-like domain, followed by the fusion  
110 of this domain with a LOTUS domain in the host genome (Blondel, et al. 2020).  
111 Biochemical assays of the properties of the LOTUS and OSK domains provide some  
112 clues as to the molecular mechanisms that Oskar uses to assemble germ plasm in *D.*  
113 *melanogaster*. The LOTUS domain is capable of homodimerization (Jeske, et al. 2015;  
114 Jeske, et al. 2017), and directly binds and enhances the helicase activity of the ATP-  
115 dependent DEAD box helicase Vasa, a germ plasm component (Jeske, et al. 2017). The  
116 OSK domain resembles GDSL lipases in sequence (Jeske, et al. 2015; Yang, et al. 2015;  
117 Blondel, et al. 2020), but is predicted to lack enzymatic activity, as the conserved amino  
118 acid triad (S200 D202 H205) that defines the active site of these lipases is not conserved  
119 in OSK (Anantharaman, et al. 2010; Jeske, et al. 2015; Yang, et al. 2015). Instead, co-  
120 purification experiments suggest that OSK has RNA binding properties, consistent with  
121 its predicted basic surface residues (Jeske, et al. 2015; Yang, et al. 2015). Whether or  
122 how changes in the primary sequence of Oskar can explain the evolution of its molecular  
123 mechanism or tissue-specific function, remain unknown.

124  
125 To date, sequences of approximately 100 *oskar* orthologs have been reported (Lynch, et  
126 al. 2011; Jeske, et al. 2015; Quan and Lynch 2016; Blondel, et al. 2020). However, the  
127 vast majority of these are from the Holometabola, and it is thus unclear whether analysis  
128 of these sequences alone would have sufficient power to allow extrapolation of  
129 conservation and divergence of putative biochemical properties across insects broadly  
130 speaking. Multiple hypotheses as to the molecular mechanistic function of particular  
131 amino acids in the LOTUS and OSK domains in *D. melanogaster* have been proposed  
132 (Jeske, et al. 2015; Yang, et al. 2015; Jeske, et al. 2017), but without sufficient taxon  
133 sampling, the potential relevance of these mechanisms to *oskar*'s evolution and function  
134 in other insects is unclear.

135

136 Here we address these outstanding questions by applying a rigorous bioinformatic  
137 pipeline to generate the most complete collection of *oskar* sequences to date. By  
138 analyzing 1862 Pancrustacean genomes and transcriptomes, we show that *oskar* likely  
139 first arose at least 400 million years ago, before the advent of winged insects (Pterygota).  
140 We find that the *oskar* locus has been lost independently in some insect orders, including  
141 near-total absence from the order Hemiptera, and clarify that the absence of *oskar* from  
142 the *Bombyx mori* and *Tribolium castaneum* genomes (discussed in Quan and Lynch  
143 2016) does not reflect a general absence of *oskar* from Lepidoptera or Coleoptera. By  
144 comparing Oskar sequences in a phylogenetic context, we reveal that distinct biophysical  
145 properties of Oskar are associated with Hemimetabola and Holometabola. We use these  
146 observations to propose testable hypotheses regarding the putative biochemical basis of  
147 evolutionary change in Oskar function across insects.

148

## 149 **Results**

### 150 *HMM-based discovery pipeline yields hundreds of novel oskar orthologs*

151 We wished to study the evolution of the *oskar* gene sequence as comprehensively as  
152 possible across all insects. To expand our previous collection of nearly 100 orthologous  
153 sequences (Blondel, et al. 2020), we designed a new bioinformatics pipeline to scan and  
154 search for *oskar* orthologs across all 1565 NCBI insect transcriptomes and genomes that  
155 were publicly available at the time of analysis (Supplementary Table S1; Figure 2; see  
156 Methods: *Genome and transcriptome pre-processing* for NCBI accession numbers and  
157 additional information). First, we used the HMMER tool suite to build HMM models for  
158 each of the LOTUS and OSK domains, using our previously generated multiple sequence  
159 alignments (MSA) (Blondel, et al. 2020). We subjected genomes to *in silico* gene model  
160 inference using Augustus (Stanke, et al. 2006). We translated the resulting predicted  
161 transcripts, as well as the predicted transcripts from RNA-seq datasets, in all six frames.  
162 We then scanned the resulting protein sequences for the presence of LOTUS and OSK  
163 domains using the aforementioned HMM models. Sequences were designated as *oskar*  
164 orthologs based on the same criteria as in our previous study (Blondel, et al. 2020),  
165 namely, sequences containing both a LOTUS and an OSK domain (Jeske, et al. 2015),  
166 separated by a variable interdomain region. We then aligned all sequences using

167 *hmmalign* and the HMM derived from our previously published full length Oskar alignment  
168 (Blondel, et al. 2020), and manually curated sequence duplicates and sequences that did  
169 not align correctly.

170  
171 With these methods, we recovered a total of 379 unique *oskar* sequences from 350  
172 unique species. To our knowledge, this comprises the largest collection of *oskar* orthologs  
173 described to date. To determine if *oskar* orthologs might predate Insecta, we applied the  
174 discovery pipeline to all 31 genomes and 266 transcriptomes of non-insect  
175 pancrustaceans available at the time of analysis (see Methods: *Genomes and*  
176 *transcriptomes preprocessing* for complete list). However, we did not recover any non-  
177 insect sequences meeting our criteria for *oskar* orthologs (Figure 3), strongly suggesting  
178 that *oskar* is restricted to the insect lineage (Lynch, et al. 2011; Ahuja and Extavour 2014).

179  
180 We found that 58.65% of RefSeq genomes (78/133), 30.42% of GenBank genomes  
181 (94/309), and 21.19% of transcriptomes (238/1123) analyzed contained predicted *oskar*  
182 orthologs (Supplementary Table S1 and Supplementary Figure S1a). Given that detection  
183 of putative orthologs is highly dependent on the quality of the genome assembly and  
184 annotation, we asked whether there were differences in the assembly statistics of  
185 genomes with and without predicted *oskar* orthologs. We observed a significant difference  
186 in N50, L50, number of contigs and number of scaffolds between genomes lacking *oskar*  
187 hits and those where *oskar* was identified (Mann-Whitney U test p-value < 0.05).  
188 Genomes where we did not find *oskar* showed a significantly higher mean/median contig  
189 and scaffold count, smaller contig and scaffold N50 length, larger contig and scaffold L50,  
190 and more contigs or scaffolds per genome length, than genomes where we detected an  
191 *oskar* ortholog (Mann Whitney U test p<0.05; Supplementary Figure S2; Supplementary  
192 Table S2).

193  
194 *oskar predates the divergence of Ametabola and other insects*

195 We identified *oskar* orthologs in 15 of the 29 generally recognized (Misof, et al. 2014)  
196 insect orders, including eight holometabolous orders, six hemimetabolous orders, and  
197 one ametabolous order (Figure 3). This result is consistent with our previous proposals

198 that *oskar* predates the origins of the Holometabola (Ewen-Campen, et al. 2012; Blondel,  
199 et al. 2020). The novel finding of an *oskar* ortholog from the silverfish *Atelura formicaria*  
200 (*Zygentoma*) allows us to date back the origin of *oskar* further than previous analyses, to  
201 at least 420 million years ago (Misof, et al. 2014), before the divergence of Ametabola  
202 from the remaining insect lineages.

203  
204 We then explored the distribution of *oskar* sequences across insect phylogeny.  
205 Interestingly, we identified multiple lineages where *oskar* appeared to have been lost  
206 independently, including confirming the previously reported (Lynch, et al. 2011) losses  
207 from the genomes of the red flour beetle *Tribolium castaneum*, the honeybee *Apis*  
208 *mellifera*, and the silk moth *Bombyx mori* (Figure 3). Notably, within Lepidoptera we  
209 identified *oskar* orthologs in only four species, despite the fact that we searched 232  
210 available lepidopteran sequence datasets, including 17 well-annotated RefSeq genomes  
211 and 135 transcriptomes (Figure 3 and Supplementary Figure S3). In principle, this  
212 apparent widespread absence of *oskar* in Lepidoptera could be due to unusually rapid  
213 evolution of the *oskar* sequence in this lineage, which might render lepidopteran *oskar*  
214 orthologs undetectable by our methods. However, we note that the only four lepidopteran  
215 orthologs we detected all belonged to species of the basally branching *Adelidae* and  
216 *Palaephatidae* families. We therefore favor the interpretation that *oskar* was lost from a  
217 last common ancestor of *Meessiidae* and *Palaphaetidae*, approximately 180 million years  
218 ago, with the consequence that the majority of extant lepidopteran lineages lack an *oskar*  
219 ortholog (Supplementary Figure S3) (Mitter, et al. 2017; Kawahara, et al. 2019).

220  
221 The Hemiptera also appear to have lost *oskar*, based on our analysis of the 222 datasets  
222 available for this clade, including 12 RefSeq genomes and 192 transcriptomes. However,  
223 we did identify an *oskar* ortholog in the Thysanoptera, which is a hemipteran sister group  
224 (Misof, et al. 2014). Finally, we identified *oskar* orthologs in only four of the 11 orders of  
225 the Polyneoptera for which data were available. With the exception of Mantodea (13  
226 transcriptomes), the four orders with detectable *oskar* sequences all had more than ten  
227 available sequence datasets (Plecoptera: three genomes and eight transcriptomes;  
228 Orthoptera: three genomes and 28 transcriptomes; Phasmatodea: 13 genomes and 31

229 transcriptomes; Blattodea: five genomes and 51 transcriptomes). The remaining orders  
230 had fewer than eight datasets each available for analysis (Figure 3; Supplementary Table  
231 S1), which could account for the apparent paucity of *oskar* genes in this group. However,  
232 we cannot rule out the possibility that *oskar* in the Polyneoptera may have diverged  
233 beyond our ability to detect it, or that it may have been lost multiple times, as observed  
234 for multiple holometabolous orders.

235  
236 As well as multiple convergent losses of *oskar*, we also uncovered evidence for  
237 independent instances of duplication of the *oskar* locus. We defined a putative duplication  
238 instance as two or more *oskar* sequences (possessing both a LOTUS and OSK domain  
239 as per our definition) in the same species that shared less than 80% sequence similarity.  
240 All of these events were detected within the Hymenoptera. We therefore performed a  
241 phylogenetic analysis of the hymenopteran sequences to test the hypothesis that these  
242 were the result of duplication events (Figure 4; Supplementary Figure S4). Our analysis  
243 of hymenopteran *oskar* sequences recovered previously published hymenopteran  
244 phylogenetic relationships (Peters, et al. 2017). We found that *oskar* was duplicated in  
245 the four Figitidae species studied, a family of parasitoid wasps. Moreover, one out of ten  
246 examined Cynipidae species, as well as the only Ceraphronidae species examined, also  
247 harbored a duplicated *oskar* sequence. Multiple *oskar* duplications were also identified in  
248 the Chalcidoid wasps, notably in the Mymaridae (all three species studied), the  
249 Eupelmidae (two out of three species), the Aphelinidae (both species) and the  
250 Pteromalidae (one out of 17 species). Finally, we identified two additional apparently  
251 independent duplication events in the Aculeata, one in the wasp *Polistes fuscatus* (of 29  
252 Vespidae, including three additional *Polistes* species, two with RefSeq genomes (*P.*  
253 *canadensis* and *P. dominula*) in which *oskar* was identified in single copy), and one in the  
254 red imported fire ant *Solenopsis invicta* (of 41 Formicidae species, including the  
255 congeneric *S. fugax*, with a GenBank genome in which *oskar* was identified in single  
256 copy).

257

258 *Evidence for oskar expression in multiple somatic tissues*

259 In studied insects to date, *oskar* is expressed and required in one or both of the germ line  
260 (Juhn and James 2006; Juhn, et al. 2008; Lynch, et al. 2011; Lehmann 2016) or the  
261 nervous system (Ewen-Campen, et al. 2012; Xu, et al. 2013). We asked whether these  
262 expression patterns could be detected in the insects studied here. To this end, we  
263 downloaded all available metadata for the transcriptomes analyzed here, to obtain  
264 information on the source tissues and developmental stages. We obtained these data for  
265 371 out of the 1123 transcriptomes in our analysis, including both holometabolous and  
266 hemimetabolous orders (see Methods: *TSA metadata parsing and curation*). To first  
267 explore the distribution of *oskar* expression in the brain and the germ line, we binned the  
268 different tissues reported in the metadata into two categories, brain or germ line. This was  
269 done independently of the developmental stage (if that information was included in the  
270 metadata) by creating a mapping table and checking the extracted tissues against this  
271 table (Supplementary Table S3 at GitHub repository  
272 ***TableS3\_germline\_brain\_table.csv***). We then cross referenced our orthology detection  
273 with these metadata. We found evidence for *oskar* expression in the germ line of four  
274 orders (Phasmatodea, Hymenoptera, Coleoptera and Diptera), and in the brain of five  
275 orders (Orthoptera, Blattodea, Hymenoptera, Coleoptera, Diptera) (see Methods: *TSA*  
276 *metadata parsing and curation* for details on keyword extractions). In addition, we found  
277 evidence of *oskar* expression in several somatic tissues not previously implicated in  
278 studies of *oskar* expression and function. These tissues included the midgut (*Polistes*  
279 *fuscatus*, *Sitophilus oryzae*), fat body (*Polistes fuscatus*, *Arachnocampa luminosa*),  
280 salivary gland (*Culex tarsalis*, *Anopheles aquasalis*, *Leptinotarsa decemlineata*), venom  
281 gland (*Culicoides sonorensis*, *Fopius arisanus*), and silk gland (*Bactrocera cucurbitae*)  
282 (Supplementary Figure S5). In terms of developmental stage, only holometabolous  
283 insects appeared to express *oskar* during embryonic, larval or nymphal stages; for all  
284 other insects, *oskar* was detected in transcriptomes derived from adults (Figure 3).  
285 However, it is important to note that for most species, transcriptomes were available only  
286 from adult tissues, rather than from a full range of developmental stages (Supplementary  
287 Figure S5). We therefore cannot rule out the possibility that *oskar* expression at pre-adult  
288 stages is also a feature of multiple Hemimetabola. Indeed, we previously reported that

289 *oskar* is expressed and required in the embryonic nervous system of a cricket, a  
290 hemimetabolous insect (Ewen-Campen, et al. 2012).

291

292 *The Long Oskar domain is an evolutionary novelty specific to a subset of Diptera*

293 *D. melanogaster* has two isoforms of Oskar (Markussen, et al. 1995): Short Oskar,  
294 containing the LOTUS, OSK and interdomain regions, and Long Oskar, containing all  
295 three domains of Short Oskar as well as an additional 5' domain (Supplementary Figure  
296 S7). It was previously reported that Long Oskar was absent from *N. vitripennis*, *C. pipiens*  
297 and *G. bimaculatus* (Lynch, et al. 2011; Ewen-Campen, et al. 2012), and within our  
298 alignment of Oskar sequences we could only detect the Long Oskar isoform within  
299 Diptera. Therefore, using our dataset, we asked when these two isoforms had evolved.  
300 We selected the dipteran sequences from our Oskar alignment and then grouped the  
301 sequences by family. We plotted the amino acid occupancy at each alignment position  
302 (Supplementary Figure S7), and found that Long Oskar predates the Drosophilids, being  
303 identified as early as the *Pinpunculidae* (Supplementary Figure S7). Moreover, following  
304 the evolution of the Long Oskar isoform, the Long Oskar domain was retained in all  
305 families except for the *Glossinidae* and *Scathophagidae*. However, given that we  
306 identified only eight and two Oskar sequences for these families respectively, we cannot  
307 eliminate the possibility that apparent absence of the Long Oskar domain in these groups  
308 reflects our small sample size, rather than true evolutionary loss.

309

310 *The LOTUS and OSK domains evolved differently between hemimetabolous and*  
311 *holometabolous insects*

312 The fact that an *oskar*-dependent germ plasm mode of germ line specification mechanism  
313 has been identified only in holometabolous insects suggests that *oskar* may have been  
314 co-opted in this clade for this function (Ewen-Campen, et al. 2012). Under this hypothesis,  
315 evolution of the *oskar* sequence in the lineage leading to the Holometabola may have  
316 changed the physico-chemical properties of Oskar protein, such that it acquired germ  
317 plasm nucleation abilities in these insects. To test this hypothesis, we asked whether  
318 there were particular sequence features associated with Oskar proteins from

319 holometabolous insects, in which Oskar can assemble germ plasm, and hemimetabolous  
320 insects, which lack germ plasm. In particular, we assessed the differential conservation  
321 of amino acids at particular positions across Oskar and asked if these might be predicted  
322 to change the physico-chemical properties of Oskar in specific ways that could potentially  
323 be relevant to germ plasm nucleation. We used the Valdar score (Valdar 2002) as the  
324 main conservation indicator for this study (see GitHub file **scores.csv**), as this metric  
325 accounts not only for transition probabilities, stereochemical properties and amino acid  
326 frequency gaps, but also for the availability of sequence diversity in the dataset. It  
327 computes a weighted score, where sequences from less well-represented clades  
328 contribute proportionally more to the score than sequences from overrepresented clades.  
329 Due to the highly unbalanced availability of genomic and transcriptomic data between  
330 hemimetabolous and holometabolous sequences (Supplementary Table S1; Figure 3) the  
331 choice of a weighted score was necessary to avoid biasing the results towards insect  
332 orders such as Diptera or Hymenoptera. To study the difference between  
333 hemimetabolous and holometabolous sequences, we did not use the Valdar score  
334 directly, but instead computed the conservation ratio between both groups for each  
335 position, which we call the Conservation bias (See Methods: Computation of the  
336 Conservation Bias). We plotted the conservation bias on the solved three-dimensional  
337 crystal structure of the *D. melanogaster* LOTUS and OSK domains (Jeske, et al. 2015;  
338 Yang, et al. 2015) to ask whether specific functionally relevant structures showed  
339 phylogenetic or other patterns of residue conservation (Figure 5).

340  
341 First, we asked if the overall conservation score of the domains was different between  
342 holometabolous and hemimetabolous sequences. We observed that the conservation  
343 bias for the LOTUS domain was centered around a mean of 1.00, indicating that both  
344 Holometabola and Hemimetabola displayed a similar conservation of the LOTUS domain  
345 (Figure 5a). For the OSK domain however, the conservation bias was centered around  
346 0.84, indicating that the hemimetabolous sequences displayed a higher level of  
347 conservation compared to holometabolous sequences (Figure 5a). We then looked at the  
348 conservation bias scores *in-situ* on the LOTUS domain structure. We asked if the amino  
349 acids of the  $\beta$  sheets of the LOTUS domain thought to be involved in dimerization of the

350 protein (Jeske, et al. 2015; Yang, et al. 2015) displayed conservation bias. Both  $\beta$  sheets  
351 had an overall even bias (mean: 1.03 and 1.05 for  $\beta$ 1 and  $\beta$ 2 respectively) between both  
352 groups (Figure 5b). Second, as we had observed that hemimetabolous OSK was more  
353 conserved overall than holometabolous OSK, we asked if there were any clear patterns  
354 of conservation bias in specific regions of the structure (Figure 5a and b). We found that  
355 some of the secondary structures within OSK showed a differential conservation ( $\alpha$ 2:  
356 0.54,  $\alpha$ 6: 0.42,  $\beta$ 2: 0.52), whereas other structures were within less than 0.1 of the median  
357 value for OSK. Moreover, we observed a large pocket of amino acids showing a  
358 conservation bias towards hemimetabolous sequences located on the surface of OSK  
359 (Figure 5c). This particular area contains the previously reported important amino acids  
360 for the RNA binding function of OSK (Jeske, et al. 2015; Yang, et al. 2015) namely, R442,  
361 R436 and R576. The electrostatic properties at those positions were conserved in the  
362 holometabolous sequences R436: 0.36, R442: 0.29 and R576: 0.81 (Figure 5d), but not  
363 in hemimetabolous sequences.

364  
365 To gain further insight into the differences in conservation across insects, we reduced the  
366 multiple sequence alignment dimensionality using a Multiple Correspondence Analysis  
367 (MCA), an equivalent of PCA for categorical variables (Lebart, et al. 1984). We performed  
368 the dimensionality reduction for the full-length Oskar sequence alignment as well as for  
369 the LOTUS and OSK alignments (Supplementary Figure S7). Interestingly, we found that  
370 most of the variance in sequence space was due to dipterans and hymenopterans  
371 (Supplementary Figure S7). When we considered the OSK domain only, we identified  
372 clusters of *Drosophilidae*, *Culicidae* and *Formicidae* sequences (Supplementary Figure  
373 S7). This clustering is also reflected for the LOTUS domain, where the *Drosophilidae* and  
374 *Culicidae* contribute to a high amount of variance in the first MCA dimension. However,  
375 for the LOTUS domain, the *Formicidae* sequences do not cluster away from other Oskar  
376 sequences (Supplementary Figure S7). This suggests that the LOTUS domain of Diptera  
377 diverged in sequence between *Drosophilidae* and *Culicidae*.

378

379 *Evidence for evolution of stronger dimerization potential of the Oskar LOTUS domain in*  
380 *Holometabola*

381 The LOTUS domain dimerizes *in vitro* through electrostatic and hydrophobic contacts of  
382 Arg215 of the  $\beta$ 2 sheet and Thr195, Asp197 and Leu200 of the  $\alpha$ 2 helix (Jeske, et al.  
383 2015; Yang, et al. 2015). To date, however, the biological significance of Oskar  
384 dimerization remains unknown. Moreover, the dimerization of the LOTUS domain does  
385 not appear to be conserved across all Oskar sequences (Jeske, et al. 2015). Specifically,  
386 ten LOTUS domains from non-drosophilid species were tested for dimerization, and only  
387 LOTUS domains from *Drosophilidae*, *Tephritidae* and *Pteromalidae* formed homodimers  
388 (Jeske, et al. 2015). The other sequences tested, from *Culicidae*, *Formicidae* and  
389 *Gryllidae*, remained monomeric under the tested conditions (Jeske, et al. 2015). We  
390 selected the LOTUS sequences in our alignment from those six families and placed them  
391 into one of two groups, dimeric and monomeric LOTUS, under the assumption that any  
392 sequence from that family would conserve the dimerization (or absence thereof)  
393 properties previously reported (Jeske, et al. 2015). We asked whether we could detect  
394 any evolutionary changes between the two groups in properties of known important  
395 dimerization interfaces and residues in our sequence alignment (Jeske, et al. 2015).

396

397 In the *D. melanogaster* structure, two key amino acids, D197 and R215, are predicted to  
398 form hydrogen bonds that stabilize the dimer (Jeske, et al. 2015). We found that in the  
399 dimer group, the electrostatic properties of these two amino acids are highly conserved  
400 (-0.75 for D197 and 0.81 for R215), while in the monomer group the electrostatic  
401 interaction is not conserved (0.03 for D197 and -0.11 for R215) (Figure 6e). Given the  
402 differential conservation between the two groups, our results support the previous finding  
403 that disrupting this interaction prevents dimerization (Jeske, et al. 2015). L200 was  
404 previously hypothesized to stabilize the interface via hydrophobic forces (Jeske, et al.  
405 2015). We observed that the hydrophobicity of this residue is highly conserved in the  
406 dimer group (L200: 0.89), but that in the monomer group this residue is hydrophilic (L200:  
407 2.33) (Figure 6f). In sum, our analyses show that key amino acids in the LOTUS domain

408 evolved differently in distinct insect lineages, in a way that may explain why some insect  
409 LOTUS domains dimerize and some do not.

410

#### 411 *Conservation of the Oskar-Vasa interaction interface*

412 Next, we asked whether we could detect differential conservation of the LOTUS-Vasa  
413 interface. It was previously reported that the LOTUS domain of Oskar acts as an  
414 interaction domain with Vasa (Jeske, et al. 2017), a key protein with a conserved role in  
415 the establishment of the animal germ line (Hay, et al. 1990; Lasko 2013). The interaction  
416 between Oskar's LOTUS domain and Vasa is through an interaction surface situated in  
417 the pocket formed by the helices  $\alpha 2$  and  $\alpha 5$  of the LOTUS domain (Figure 6a b and c).  
418 Due to the essential role that *vasa* plays in germ line determination (reviewed in Raz  
419 2000; Noce, et al. 2001; Extavour and Akam 2003; Ewen-Campen, et al. 2010; Lasko  
420 2013), and the potential co-option of *oskar* to the germ line determination mechanism in  
421 Holometabola (Ewen-Campen, et al. 2012), we hypothesized that evolutionary changes  
422 in the conservation of the residues of this interface might be detectable between  
423 Holometabola and Hemimetabola. First, we observed that the residues of the LOTUS  
424 domain  $\alpha 2$  and  $\alpha 5$  helices, which directly contact Vasa (Jeske, et al. 2017) were highly  
425 conserved overall ( $\alpha 2$  average Valdar score 0.49;  $\alpha 5$  Valdar score 0.56) (Figure 6b).  
426 Specifically, we observed that the previously reported Vasa interacting amino acids A162  
427 and L228 of the LOTUS domain were highly conserved (Valdar score: 0.64 for both  
428 residues) (Jeske, et al. 2017). We also noted that Q235 and H227 of the LOTUS domain  
429  $\alpha 5$  helix are likely to be important interaction partners due to their high conservation  
430 (Valdar score: 0.90 and 0.90 for both residues) (Figure 6b). Moreover, facing the LOTUS  
431 domain H227 is Vasa M540, which may act as a proton donor to form a hydrogen bond  
432 between the histidine ring and the sulfur atom of the methionine (Pal and Chakrabarti  
433 2001) (Figure 6b and b'). The LOTUS domain  $\alpha 2$  helix is overall slightly less conserved  
434 than the LOTUS domain  $\alpha 5$  helix (Valdar score: 0.49 vs 0.56) (Figure 6a, b'', c''), but  
435 hydrophobic properties are conserved on one side of the  $\alpha 2$  helix (Figure 6c, c') forming  
436 a motif of conserved amino acid properties (Figure 6c'').

437

438 Previous reports have hypothesized that the *D. melanogaster* LOTUS domain could act  
439 as a dsRNA binding domain (Anantharaman, et al. 2010; Callebaut and Mornon 2010).  
440 However, in *D. melanogaster*, it was later reported that the LOTUS domain did not bind  
441 to nucleotides (Jeske, et al. 2015). Therefore, using our dataset we assessed the potential  
442 RNA binding properties of LOTUS domains to test the conservation of this prediction. We  
443 used the RNABindR algorithm (Terribilini, et al. 2007) to predict potential RNA binding  
444 sites of the LOTUS domain, and computed a conservation score for each position  
445 (Terribilini, et al. 2007). We found that the  $\alpha 5$  helix is the location in the LOTUS domain  
446 that has the most conserved prediction for RNA binding (Figure 6d).

447  
448 Finally, we asked whether the secondary structure of the LOTUS domain might be  
449 conserved. Secondary structures are often indicative of the tertiary structure of a domain.  
450 Therefore, we reasoned that the secondary structure might be conserved even if the  
451 sequence varies. We submitted the LOTUS sequences from all identified Oskar orthologs  
452 to the Jpred4 servers (Drozdetskiy, et al. 2015) for secondary structure prediction and  
453 mapped the results onto the Oskar alignment we obtained. We found that the secondary  
454 structure of LOTUS is highly conserved throughout Oskar orthologs, with the exception  
455 of the  $\alpha 1$  helix (Supplementary Figure S8) which displays a low conservation score of  
456 0.19 (Figure 6a).

457  
458 *The core of the OSK domain is conserved*

459 We asked whether the OSK domain showed any differential conservation across the  
460 different parts of the domain. We found that the OSK domain of Oskar showed an overall  
461 conservation across all insects, similar to the LOTUS domain (Valdar score: 0.51) (Figure  
462 7a). However, the conservation pattern is higher in the core amino acids (Valdar score  
463 average of core amino acid: 0.54) when compared to the residues at the surface (Valdar  
464 score average for surface amino acid: 0.23) (Figure 7a). Despite the overall low  
465 conservation of the residues at the surface of the OSK domain, we found that the  
466 electrostatic properties are conserved overall (electrostatic conservation score  $>0$ ;  
467 conserved) in the previously reported putative RNA binding pocket (Yang, et al. 2015).  
468 However, as previously mentioned, this conservation is stronger in holometabolous

469 sequences (Figure 5d). These results are in accordance with the potential role of OSK as  
470 an RNA Binding domain in the context of germ plasm assembly (Jeske, et al. 2015; Yang,  
471 et al. 2015). We also submitted the OSK sequences to the same secondary structure  
472 analysis performed on LOTUS. We found that, as for the LOTUS domain, the secondary  
473 structure of OSK is highly conserved throughout all insect sequences analyzed  
474 (Supplementary Figure S8).

475  
476 We then asked if the conservation patterns observed at the core of OSK were clustered  
477 in sequence motifs. When we looked at the location of the highly conserved amino acids,  
478 we found that the conservation was driven by four well-defined sequence motifs (Figure  
479 7c, c', c'', c'''). Given that *oskar* plays different roles in Holometabola and Hemimetabola,  
480 we asked whether the conserved OSK motifs showed any difference in conservation  
481 between these two groups. Of the four highly conserved OSK core motifs (Figure 7c, c',  
482 c'', c'''), two of them (Figure 7c: Valdar average score: 0.80 and c'' Valdar average score:  
483 0.71) were conserved across all insects, but the other two showed differential  
484 conservation between the holometabolous and hemimetabolous sequences (Figure 7c':  
485 Valdar score average Holometabola: 0.78; Hemimetabola: 0.58 c''': Valdar score average  
486 Holometabola: 0.70, Hemimetabola: 0.55). Finally, we noted that only one of the affected  
487 OSK domain residues in known loss of function *oskar* alleles affecting posterior patterning  
488 in *D. melanogaster*, S457, is conserved across all insects (Valdar score: 0.86). This  
489 suggests that the role of the other previously reported important amino acids in the  
490 function of *D. melanogaster* OSK (Yang, et al. 2015) might not be conserved in other  
491 insects (red positions in Figure 7c, c', c'', c''').

492

## 493 **Discussion**

### 494 *An expanded collection of oskar orthologs*

495 *oskar* provides a powerful case study of functional evolution of a gene with an unusual  
496 genesis (Blondel, et al. 2020). Here, we gathered the most extensive set of orthologous  
497 *oskar* sequences to date. However, most insect genomic and transcriptomic data have  
498 been generated from only a few orders, and the vast majority from the Holometabola.  
499 Diptera, Lepidoptera, Coleoptera, Hymenoptera and Hemiptera represent 82% of the

500 datasets available at the time of this analysis. We emphasize that expanded taxon  
501 sampling, particularly for the Hemimetabola, will be critical for further studies of the  
502 evolution of protein function across insects. Moreover, only a small proportion (27% for  
503 tissue type, 26% for organism stage, and 14% for sex) of the TSA datasets contained  
504 usable metadata regarding the stage and tissue type sampled. Future standardization of  
505 the nature and format of transcriptomic metadata would also be a worthwhile endeavor  
506 that could increase the efficiency and efficacy of future work.

507

### 508 *Convergent losses and duplications of oskar in insect evolution*

509 A previous report suggested that *oskar* had been lost from the genome of the silk moth  
510 *B. mori* (Lynch, et al. 2011). Our analysis of 232 datasets across 44 of the 126 described  
511 lepidopteran families (Kawahara, et al. 2019) strongly suggests that the loss of *oskar* in  
512 the Lepidoptera (butterflies and moths) is not unique to the silk moth, but rather occurred  
513 early and repeatedly in lepidopteran evolution. The fact that *oskar* is a component of the  
514 oosome at the posterior of the oocyte (the wasp germ plasm analog ([Quan, et al. 2019](#)))  
515 and required for germ cell formation in the wasp *Nasonia vitripennis* (Lynch, et al. 2011)  
516 implies that a common ancestor of Holometabola had already established an *oskar*-  
517 dependent inheritance mode of germ line specification. Therefore, the apparent  
518 subsequent loss in nearly all Lepidoptera examined of a gene responsible for the  
519 establishment of the germ plasm in other Holometabola might seem unexpected. Few  
520 studies have directly addressed the molecular mechanisms of germ cell specification in  
521 Lepidoptera. In *B. mori* (Bombycidae), *vasa* mRNA (Nakao 1999) and protein (Nakao, et  
522 al. 2006), and the transcripts of one of four *nanos* orthologs (*nanos-O*) (Nakao, et al.  
523 2008), have been detected in a region of ventral cortical cytoplasm in pre-blastoderm  
524 stage embryos. As putative primordial germ cells form in this location at later stages (Miya  
525 1958), some authors have speculated that a germ plasm, located ventrally rather than  
526 posteriorly, may specify germ cells in this moth (Toshiki, et al. 2000; Nakao, et al. 2008).  
527 However, recent knockdown experiments showed that maternal *nanos-O* is dispensable  
528 for germ cell formation (Nakao and Takasu 2019), consistent with a zygotic, inductive  
529 mechanism. In the butterfly *Pararge argeria* (Nymphalidae), no *oskar* ortholog has been  
530 identified in the genome (Carter, et al. 2013), but the transcripts of one of four identified

531 *nanos* orthologs (*nanos-O*) have been detected in a small region of ventral cortical  
532 ooplasm, again prompting speculation that this lepidopteran may also deploy a germ  
533 plasm (Carter, et al. 2015). We suggest that if these or other Lepidoptera do indeed rely  
534 on germ plasm to specify their germ line, they may do so using a germ plasm nucleator  
535 other than Oskar. For most studied Lepidoptera, however, classical embryological studies  
536 report the first appearance of primordial germ cells at post-blastoderm stages, either from  
537 the ventral midline of the cellular blastoderm or early germ band (Woodworth 1889;  
538 Tomaya 1902; Sehl 1931; Miya 1953, 1958, 1975; Tanaka 1987), from the coelomic sac  
539 mesoderm of the abdomen (Johannsen 1929; Eastham 1930; Saito 1937; Presser and  
540 Rutschky 1957; Kobayashi and Ando 1984), or from the primary ectoderm of the caudal  
541 germ band (Schwangart 1905; Lautenschlager 1932; Ando and Tanaka 1979; Tanaka  
542 1987; Guelin 1994) (Figure S6). Taken together, these data suggest that an inductive  
543 mechanism may operate to specify germ cells in most moths and butterflies. We  
544 speculate that the loss of *oskar* from most lepidopteran genomes may have facilitated or  
545 necessitated secondary reversion to the hypothesized ancestral inductive mechanism for  
546 germ line specification.

547  
548 Another order with apparent near-total absence of *oskar* orthologs is the Hemiptera (true  
549 bugs), whose sister group Thysanoptera (thrips) nevertheless possesses *oskar*. This  
550 secondary loss of *oskar* from a last common hemipteran ancestor correlates with the  
551 reported post-blastoderm appearance of primordial germ cells in the embryo. Classical  
552 studies on most hemipteran species describe germ cell formation as occurring after  
553 cellular blastoderm formation, on the inner (yolk-facing) side of the posterior blastoderm  
554 surface (Metschnikoff 1866; Witlaczil 1884; Will 1888; Mellanby 1935; Butt 1949; Kelly  
555 and Huebner 1989; Heming and Huebner 1994). A notable exception to this is the  
556 parthenogenetic pea aphid *Acyrtosiphon pisum*, for which strong gene expression and  
557 morphological evidence supports a germ plasm-driven germ cell specification mechanism  
558 in both sexual and asexual modes (Miura, et al. 2003; Chang, et al. 2006; Lin, et al. 2014).  
559 In contrast, studies of the aphids *Aphis plantoides*, *A. rosea* and *A. pelargonii* describe  
560 no germ plasm, and post-blastoderm germ cell formation (Metschnikoff 1866; Witlaczil  
561 1884; Will 1888). However, the genomes of all aphids studied here, including *A. pisum*

562 and three *Aphis* species, appear to lack *oskar*. This suggests that germ plasm assembly  
563 in *A. pisum* either does not require a nucleator molecule or uses a novel non-Oskar  
564 nucleator.

565 In the Hymenoptera (ants, bees, wasps and sawflies), our results strongly suggest that  
566 *oskar* was lost from the genome of the last common ancestor of bees and spheroid wasps  
567 (Supplementary Figure S9). Our analysis further suggests multiple additional  
568 independent losses in as many as 25 other hymenopteran lineages, including some for  
569 which good quality RefSeq genomes were available (e.g. the slender twig ant  
570 *Pseudomyrmex gracilis* or the wheat stem sawfly *Cephus cinctus* (Supplementary Figure  
571 S9). However, it would be premature to draw strong conclusions about the number of  
572 independent losses given the predominance of transcriptome data in the Hymenoptera.

573 In addition to convergent losses of *oskar*, we also found evidence for clade-specific  
574 duplications of *oskar* in the Hymenoptera. Seven of the nine families containing these  
575 putative duplications are families of parasitoid wasps; the remaining two families are ants  
576 (Formicidae) and the group of yellowjackets, hornets, and paper wasps (Vespidae)  
577 (Figure 4). The phylogenetic relationships of these groups make it highly unlikely that a  
578 duplication occurred only once in their last common ancestor, which would be the last  
579 common ancestor of all wasps, bees and ants (i.e. Apocrita, all hymenopterans except  
580 sawflies) (Supplementary Figure S9). We suggest that the most parsimonious hypothesis  
581 is one of three to five independent duplications of *oskar*, followed by at least nine to 14  
582 independent reversions to a single copy, or total loss of the locus (Supplementary Figure  
583 9).

584 No notable life history characteristics appear to unite those species with multiple *oskar*  
585 orthologs: they include eusocial and solitary, sting-bearing and stingless, parasitoid and  
586 non-parasitic insects. To our knowledge, neither is there anything unique about the germ  
587 line specification process in Hymenoptera with one or more than one *oskar* ortholog. Most  
588 Hymenoptera appear to use a germ plasm-driven mechanism to specify germ cells in  
589 early blastoderm stage embryos (Supplementary Figure S9 and references therein), and  
590 we identified *oskar* orthologs for all such species described in the embryological literature  
591 (Supplementary Figure S9). In the notable example of the honeybee *Apis mellifera*, in

592 which cytological and molecular evidence suggests germ cell arise from abdominal  
593 mesoderm (Bütschli 1870; Nelson 1915; Fleig and Sander 1985, 1986; Zissler 1992;  
594 Gutzeit, et al. 1993; Dearden 2006), we identified no *oskar* ortholog in its well-annotated  
595 genome (Supplementary Figure S9), as noted previously by other authors (Lynch, et al.  
596 2011). However, no major differences in germ plasm or pole cell formation have been  
597 reported in species or families of ants or wasps with duplicated *oskar* loci, compared with  
598 close relatives that possess *oskar* in single copy (e.g. compare the ants *Solenopsis invicta*  
599 (at least 2 *oskars*) and *Aphaenogaster rudis* (1 *oskar*) (Khila and Abouheif 2008), or the  
600 pteromalid wasps *Nasonia vitripennis* (1 *oskar*) (Lynch and Desplan 2010; Lynch, et al.  
601 2011; Quan, et al. 2019) and *Otitesella tsamvi* (2 *oskars*). Thus, future studies that  
602 independently abrogate the functions of each paralog individually, will be needed to  
603 determine the biological significance, if any, of these *oskar* duplications.

604

#### 605 *Functional implications of differential conservation of the LOTUS and OSK domains*

606 We have identified novel conserved amino acid positions that we hypothesize are  
607 important for the Vasa binding properties of the LOTUS domain and the RNA properties  
608 binding of the OSK domain (Figure 6 and 7). Our observation of the conservation of the  
609 LOTUS domain  $\alpha 2$  helix is consistent with its previously reported importance LOTUS-  
610 Vasa binding (Jeske, Müller, and Ephrussi 2017). In the  $\alpha 2$  helix, we also observed high  
611 conservation of H227 and Q235. The positions of these residues suggest they may  
612 contribute to the interaction between Vasa and LOTUS. We suggest they should therefore  
613 be the target of future mutational studies.

614

615 We also uncovered an interesting new conservation pattern within the OSK domain. The  
616 conserved amino acids were more abundant in the core of the domain than on the  
617 surface. This differential conservation might be relevant to the acquisition of a germ plasm  
618 nucleator role of *oskar* in the Holometabla (Figure 5). We noted that the basic properties  
619 of surface residues previously reported for *D. melanogaster* (Yang, et al. 2015) are  
620 conserved across insects, which might indicate that the RNA binding properties of OSK  
621 observed in *D. melanogaster* (Jeske, et al. 2015; Yang, et al. 2015) are also conserved

622 throughout holometabolous insects. We speculate that the comparatively low amino acid  
623 conservation of the surface residues in Holometabolous OSK domains, which  
624 nevertheless display highly conserved basic properties, could have allowed greater  
625 flexibility in the co-evolution of specific RNA binding partners for the OSK domains of  
626 different lineages.

627

628 *OSK evolved differentially between holometabolous and hemimetabolous insects*

629 Finally, we observed a differential conservation of the OSK domain between  
630 hemimetabolous and holometabolous insects. Specifically, we found that the OSK  
631 sequence was less conserved across the Holometabola than across the Hemimetabola.  
632 This observation raises two potential hypotheses regarding the role of the OSK domain  
633 in the functional evolution of Oskar. First, perhaps the apparently relaxed purifying  
634 selection experienced by OSK in the Holometabola was necessary for the co-option of  
635 *oskar* to a germ plasm nucleation role. Second, Oskar might have a function in the  
636 hemimetabolous insects that requires strong conservation of OSK. More studies on the  
637 roles and biochemical properties of OSK in hemimetabolous insects will be required to  
638 test these hypotheses and further our understanding of the biological relevance of this  
639 differential conservation.

640

641 In conclusion, analysis of the large dataset of novel Oskar sequences presented here  
642 provides multiple new testable hypotheses concerning the molecular mechanisms and  
643 functional evolution of *oskar*, that will inform future studies on the contribution of this  
644 unusual gene to the evolution of animal germ cell specification.

645

## 646 **Materials and Methods**

647 *Lead contact and materials availability*

648 This study did not generate new unique reagents. This study generated new python3  
649 code and supplementary files referred to below, all of which are available  
650 [https://github.com/extavourlab/Oskar\\_Evolution](https://github.com/extavourlab/Oskar_Evolution). Requests for further information and  
651 requests for resources and reagents should be directed to and will be fulfilled by  
652 Cassandra G. Extavour ([extavour@oeb.harvard.edu](mailto:extavour@oeb.harvard.edu)).

653

#### 654 *Experimental model and subject details*

655 This study used no animal model, nor any cell culture lines. However, it used previously  
656 generated genomic and transcriptomic datasets. All the information regarding how those  
657 datasets were generated can be found on their respective NCBI pages. The list of all the  
658 datasets used in this study can be found in the following files:

659 ***genome\_insect\_database.csv***, ***transcriptome\_insect\_database.csv***,

660 ***genome\_crustacean\_database.csv***, and ***transcriptome\_crustacean\_database.csv***.

661

#### 662 *Genome and transcriptome preprocessing*

663 We collected all available genome and transcriptome datasets from the NCBI repository  
664 registered in September 2019 (Figure 2). NCBI maintains two tiers of genomic data:  
665 RefSeq, which contains curated and annotated genomes, and GenBank, which contains  
666 non-annotated assembled genomic sequences. Transcriptomes are stored in the  
667 Transcriptome Shotgun Assembly (TSA) database, with metadata including details on  
668 their origin. Among the registered datasets, five genomes were not yet available, and 40  
669 transcriptomes were only available in the NCBI Trace repository. As they did not comply  
670 with the TSA database standards, they were excluded from the analysis. To search for  
671 *oskar* orthologs in datasets retrieved from GenBank, we needed to generate *in silico* gene  
672 model predictions. We used the genome annotation tool Augustus (Stanke et al. 2006),  
673 which requires a Hidden Markov Model (HMM) gene model. To use HMMs producing  
674 gene models that would be as accurate as possible for non-annotated genomes, we  
675 selected the most closely related species (species with the most recent last common  
676 ancestor) that possessed an annotated RefSeq genome. We then used the Augustus  
677 training tool to build an HMM gene model for each genome.

678

679 We automated this process by creating a series of python scripts that performed the  
680 following tasks:

681

682 1) ***1.1\_insect\_database\_builder.py***: This script collects the NCBI metadata  
683 regarding genomes and transcriptomes. Using the NCBI Entrez API, it collects the

684 most up to date information on RefSeq, GenBank, and TSA to generate two CSV  
685 files: *genome\_insect\_database.csv* and *transcriptome\_insect\_database.csv*.

686 2) **1.2\_data\_downloader.py**: This is a python wrapper around the *rsync* tool that  
687 downloads the sequence datasets present in the tables created by (1). It  
688 automatically downloads all the available information into a local folder.

689 3) **1.3\_run\_augustus\_training.py**: This is a python wrapper around the Augustus  
690 training tool. It uses the metadata gathered using (1) and the sequence information  
691 gathered using (2) to build HMM gene models of all RefSeq datasets. It outputs  
692 sbatch scripts that can be run either locally, or on a SLURM-managed cluster.  
693 Those scripts will create unique HMM gene models per species.

694  
695 At the time of this analysis (September 2019), 133 insect genomes were collected from  
696 the RefSeq database, 309 genomes from the GenBank database, and 1123  
697 transcriptomes from the TSA database. All the accession numbers and metadata are  
698 available in the two tables (***genome\_insect\_database.csv*** and  
699 ***transcriptome\_insect\_database.csv***) provided in the supplementary files. This pipeline  
700 was repeated for crustaceans and the information can be found in the following two files:  
701 ***genome\_crustacean\_database.csv*** and ***transcriptome\_crustacean\_database.csv***.

702  
703 *Creation of protein sequence databases*

704 The classical approach for orthology detection compares protein sequences to amino acid  
705 HMM corresponding to the gene of interest. Since we used three different NCBI  
706 databases, we performed the following preprocessing actions:

707  
708 1) RefSeq: well-annotated genomes from NCBI contain gene model translation; no  
709 extra processing was required.

710 2) GenBank: Using the HMMs created from the RefSeq databases, we created gene  
711 models for each GenBank genome using Augustus and a custom HMM gene  
712 model. To choose which HMM gene model to use, we selected the one for each  
713 insect order that had the highest training accuracy. In the case where an insect  
714 order did not have any member in the RefSeq database, we used the model of the

715 most closely related order. We then translated the inferred coding sequences to  
716 create a protein database for each genome. The assignment of the models used  
717 to infer the proteins of each GenBank genome is available in the  
718 **Table\_S4\_models.csv** available through the GitHub repository for this study at  
719 [https://github.com/extavourlab/Oskar\\_Evolution](https://github.com/extavourlab/Oskar_Evolution). To automate the process, we  
720 created a custom python script available in the file **1.4\_run\_augustus.py**.

721 3) TSA: Transcriptomes were translated using the emboss tool Transeq (Madeira, et  
722 al. 2019). We used this tool with the default parameters, except for the six-frame  
723 translation, trim and clean flags. This generated amino acid sequences for each  
724 transcript and each potential reading frame.

#### 725 726 *Identification of oskar orthologs*

727 The *oskar* gene is composed of two conserved domains, LOTUS and OSK, separated by  
728 a highly variable interdomain linker sequence (Ahuja and Extavour 2014; Jeske, et al.  
729 2015; Yang, et al. 2015). To our knowledge, no other gene reported in any domain of life  
730 possesses this domain composition (Blondel, et al. 2020). Therefore, here we use the  
731 same definition of *oskar* orthology as in our previous work: a sequence possessing a  
732 LOTUS domain followed by an interdomain region, and then an OSK domain (Blondel, et  
733 al. 2020). To maximize the number of potential orthologs, we searched each sequence  
734 with the previously generated HMM for the LOTUS and OSK domains (Blondel, et al.  
735 2020). The presence and order of each domain were then verified for each potential hit  
736 and only sequences with the previously defined Oskar structure were kept for further  
737 processing. We used the HMMER 3.1 tool suite to build the domain HMM (*hmmbuild* with  
738 default parameters), and then searched the generated protein databases (see *Creation*  
739 *of protein sequence databases* above) using those models (*hmmsearch* with default  
740 parameters). Hits with an E-value  $\geq 0.05$  were discarded. A summary of all searches  
741 performed is compiled in **Table\_S5\_searches.csv** in the GitHub repository for this study  
742 at [https://github.com/extavourlab/Oskar\\_Evolution](https://github.com/extavourlab/Oskar_Evolution).

743  
744 All the hits were then aligned with *hmmalign* with default parameters and the HMM of the  
745 full-length Oskar alignment previously generated (Blondel, et al. 2020). The resulting

746 sequences were automatically processed to remove assembly artifacts, and potential  
747 isoforms. This filtration step was automated and went as follows: First, the sequences  
748 were grouped by taxon. Then each group of sequences was aligned using MUSCLE  
749 (Edgar 2004) with default parameters. The Hamming distance (Hamming 1950), a metric  
750 that computes the number of different letters between two strings, between each  
751 sequence in the alignment, was computed. If any group of sequences had a Hamming  
752 distance of >80%, then we only kept the sequence with the lowest E-value match. This  
753 created a set of sequences containing multiple *oskar* orthologs per species only if they  
754 were the likely product of a gene duplication event. We then used the resulting new  
755 alignment to generate a new domain HMM and a new full-length Oskar HMM (using  
756 *hmmbuild* with default parameters) and ran further iterations of this detection pipeline until  
757 we could detect no new *oskar* orthologs in the available sequence datasets. We called  
758 this final set the **filtered set** of sequences and used it in all subsequent orthology  
759 analyses unless otherwise specified.

760

761 The Oskar sequences obtained are available in the following supplementary files:  
762 ***Oskar\_filtered.aligned.fasta***, ***Oskar\_filtered.fasta*** and ***Oskar\_consensus.hmm***.

763 The domain definitions for the LOTUS and OSK domains are available in the following  
764 supplementary files: ***Oskar\_filtered.aligned.LOTUS\_domain.fasta***,  
765 ***LOTUS\_consensus.hmm***, ***Oskar\_filtered.aligned.OSK\_domain.fasta***,  
766 ***OSK\_consensus.hmm*** (see ***1.5\_Oskar\_tracker.ipynb***).

767

768 *Correlative analysis of assembly quality and absence of oskar*

769 Using the metadata gathered previously from NCBI databases (see *Genomes and*  
770 *transcriptomes preprocessing* above) we created two pools of source data: genomes  
771 where we identified an *oskar* sequence, and genomes where we failed to find a sequence  
772 that met our orthology criteria. We then compared the two distributions for each of the 8  
773 available assembly statistics: (1) Contig and (2) Scaffold N50, (3) Contig and (4) Scaffold  
774 L50, (5) Contig and (6) Scaffold counts, and (7) Number of Contigs and (8) Scaffolds per  
775 genome length. Finally, we performed a Mann-Whitney U statistical analysis to compare  
776 the means of the two distributions (see ***2.1\_Oskar\_discovery\_quality.ipynb***).

777

### 778 *TSA metadata parsing and curation*

779 Datasets in the TSA database are associated with a biosample object that contains all  
780 the metadata surrounding the RNA sequencing acquisitions. These metadata can include  
781 information about one or both the tissue of origin and the organism's developmental  
782 stage. We first automated the retrieval of these metadata using a custom python script  
783 that used the NCBI Entrez API (see **2.3\_Oskar\_tissues\_stages.ipynb**). However, the  
784 metadata proved to be complex to parse for the following reasons: (1) not all projects had  
785 the data entered in the corresponding tag, (2) some data contained typographical errors,  
786 and (3) multiple synonyms were used to describe the same thing with different words in  
787 different datasets. We therefore created a custom parsing and cleaning pipeline that  
788 corrected mistakes and aggregated them into a cohesive set of unique terms that we  
789 thought would be most informative to interpret the presence or absence of *oskar* orthologs  
790 (see **2.3\_Oskar\_tissues\_stages.ipynb** to see the mapping table). This strategy  
791 sacrificed some of the fine-grained information contained in custom metadata (for  
792 example "right leg" became "leg") but allowed us to analyze the expression of *oskar* using  
793 consistent criteria throughout all the datasets. This pipeline generated, for all available  
794 datasets, a table of tissues and developmental stages including *oskar* presence or  
795 absence in the dataset (see **Oskar\_all\_tissues\_stages.csv**).

796

### 797 *Dimensionality reduction of Oskar alignment sequence space*

798 The Oskar alignment was subjected to a Multiple Correspondence Analysis (MCA).  
799 Similar to a PCA, dimension vectors were first computed to maximize the spread of the  
800 underlying data in the new dimensions, except that instead of a continuous dataset, each  
801 variable (here an amino acid at a given position) contributes to the continuous value on  
802 that dimension. Once the projection vectors are computed, each sequence was then  
803 mapped onto the dimensions. Each amino acid position (column) in the alignment was  
804 considered a dimension with a possible value set of 21 (20 amino acids and gap). We  
805 first removed the columns of low information (columns that had less than 30% amino acid  
806 occupancy) using trimal (Capella-Gutierrez, et al. 2009) with a cutoff parameter set at 0.3.  
807 Then, the alignment was decomposed into its eigenvectors, and projected to the first three

808 components. To perform this decomposition, we implemented a previously developed  
809 preprocessing method (Rausell, et al. 2010) in a python script (see ***MCA.py*** and  
810 ***2.8\_Oskar\_MCA\_Analysis.ipynb***) and performed the eigenvector decomposition with  
811 the previously developed MCA python library (see *Key Resource Table*). We ran the  
812 same algorithm on the LOTUS domain, OSK domain, and full-length Oskar alignments  
813 obtained above (see *Identification of oskar orthologs* above).

814

#### 815 *Phylogenetic inference of Oskar sequences in the Hymenoptera*

816 We aligned all hymenopteran Oskar sequences using PRANK (Loytynoja 2014) with  
817 default parameters. We then manually annotated duplicated sequences by considering  
818 two sequences from the same species that had < 80% amino acid identity, as within-  
819 species duplications of *oskar*. We trimmed this alignment to remove all columns with less  
820 than 50% occupancy using trimal with the cutoff parameter set at 0.5. To reconstruct the  
821 phylogeny of these sequences, we used the maximum likelihood inference software  
822 RAxML (Stamatakis 2014) with a gamma-distributed protein model, and activated the flag  
823 for auto model selection. We ran 100 bootstraps and then visualized and annotated the  
824 obtained tree with Ete3 (Huerta-Cepas, et al. 2016) in a custom ipython notebook (see  
825 ***2.7\_Oskar\_duplication.ipynb***).

826

#### 827 *Calculation of Oskar conservation scores*

828 Using the large set of orthologous Oskar sequences obtained as described above, we  
829 computed different conservation scores for each amino acid position. This methodology  
830 relies on the hypotheses that if an amino acid, or its associated chemical properties at a  
831 particular position in the sequence are important for the structure and/or function of the  
832 protein, they will be conserved across evolution. We considered multiple conservation  
833 metrics, each highlighting a particular aspect of the protein's properties as described in  
834 the following sections. The scores can be found in the supplementary file ***scores.csv***.

835

#### 836 *Computation of the Valdar score*

837 The Valdar score (Valdar 2002) attempts to account for transition probabilities,  
838 stereochemical properties, amino acid frequency gaps, and, particularly essential for this

839 study, sequence weighting. Due to the heterogeneity of sequence dataset availability,  
840 most Oskar sequences occupy only a small portion of insect diversity, primarily  
841 Hymenoptera, and Diptera. Sequence weighting allows for the normalization of the  
842 influence of each sequence on the score based on how many similar sequences are  
843 present in the alignment (Valdar 2002). We implemented the algorithm described in  
844 (Valdar 2002) in a python script (see *besse\_blonde\_l\_conservation\_scores.py*), then  
845 calculated the conservation scores for the Oskar alignment we generated above.

846

#### 847 *Computation of the Jensen-Shannon Divergence score*

848 Jensen-Shannon Divergence (JSD) (Lin 1991; Capra and Singh 2007) uses the amino  
849 acid and stereochemical properties to infer the “amount” of evolutionary pressure an  
850 amino acid position may be subject to. This score uses an information theory approach  
851 by measuring how much information (in bits) any position in the alignment brings to the  
852 overall alignment (Capra and Singh 2007). This score also takes into account neighboring  
853 amino acids in calculating the importance of each amino acid. We used the previously  
854 published python code to calculate the JSD of our previously generated Oskar alignment  
855 (Capra and Singh 2007) (see *score\_conservation.py*).

856

#### 857 *Computation of the Conservation Bias*

858 The measure of differences in conservation between the holometabolous and  
859 hemimetabolous Oskar sequences presented in the results was done as follows: we first  
860 split the alignment into two groups containing the sequences from each clade (see  
861 *2.4\_Oskar\_pgc\_specification.ipynb*). Due to the high heterogeneity in taxon sampling  
862 between hemimetabolous and holometabolous insects, we ran a bootstrapped  
863 approximation of the conservation scores on holometabolous sequences. We randomly  
864 selected N sequences (N = the number of hemimetabolous sequences), computed the  
865 Valdar conservation score (see *Computation of the Valdar score* above), and stored it.  
866 After 1000 iterations, we computed the mean conservation score for each position for  
867 holometabolous sequences. For hemimetabolous sequences, we directly calculated the  
868 Valdar score using the method as described above (see *Computation of the Valdar score*  
869 above). For each position, we then computed what we refer to as the “conservation bias”

870 between Holometabola and Hemimetabola by taking the ratio of the log of the  
871 conservation score Holometabola and Hemimetabola. Conservation Bias =  $\log(\text{Valdar}_{\text{holo}})$   
872 /  $\log(\text{Valdar}_{\text{hemi}})$  for each position (see **3.4\_LogRatio\_Bootstrap.ipynb**).

873

#### 874 *Computation of the electrostatic conservation score*

875 To study the conservation of electrostatic properties of the Oskar protein we computed  
876 our own implementation of an electrostatic conservation score (see  
877 ***besse\_blondel\_conservation\_scores.py***). Aspartic acid and Glutamic acid were given  
878 a score of -1, Arginine and Lysine a score of 1, and Histidine a score of 0.5. All other  
879 amino acids were given a score of 0. Then, we summed the electrostatic score for each  
880 sequence at each position and divided this raw score by the total number of sequences  
881 in the alignment. This computation assigns a score between -1 and 1 at each position, -  
882 1 being a negative charge conserved across all sequences, and 1 a positive charge.

883

#### 884 *Computation of the hydrophobic conservation score*

885 To study the conservation of hydrophobic properties of the Oskar protein we implemented  
886 our own hydrophobic conservation score (see  
887 ***besse\_blondel\_conservation\_scores.py***). At each position, each amino acid was given  
888 a hydrophobic score taken from a previously published scoring table (Moon and Fleming  
889 2011). (This table is implemented in the ***besse\_blondel\_conservation\_score.py*** file for  
890 simplicity.) Scores at each position were then averaged across all sequences. This metric  
891 allowed us to measure the hydrophobicity conservation of each position in the alignment  
892 and is bounded between 5.39 and -2.20.

893

#### 894 *Computation of the RNA binding affinity score*

895 RNA binding sites are defined as areas with positively charged residues and hydrophobic  
896 residues. To estimate the conservation of RNA binding sites in *oskar* orthologs, we used  
897 RNABindR v2.0 (Terribilini, et al. 2007), an algorithm predicting putative RNA binding  
898 sites based on sequence information only. We automated the calculation for each  
899 sequence by writing a python script that submitted a request to the RNABindR web  
900 service (see ***RNABindR\_run\_predictions.py***). We then aggregated all results into a

901 scoring matrix, and averaged the score obtained for each position. We call this score the  
902 RNABindR score and hypothesize that it reflects the conservation of RNA binding  
903 properties of the protein. Importantly, this score was obtained in 2017 for only a subset of  
904 219 proteins used in this study (indicated in the supplementary files at:  
905 03\_Oskar\_scores\_generation/RNABindR\_raw\_sources). Since then, the RNABindR  
906 server has been defunct and we could not repeat those measurements as the source  
907 code for this software is unavailable.

908

### 909 *Computation of secondary structure conservation*

910 Due to the overall low conservation of the LOTUS domain, we decided to see whether  
911 the secondary structure was conserved. To this end, we used the secondary structure  
912 prediction algorithm JPred 4 (Drozdetskiy, et al. 2015). Given an amino acid sequence,  
913 this tool returns a positional prediction for  $\alpha$ -helix,  $\beta$ -sheet or unstructured. We used the  
914 JPred4 web servers to compute the predictions and processed them into a secondary  
915 structure alignment (see **2.6\_Oskar\_lotus\_osk\_structures.ipynb**). We then used  
916 WebLogo (Crooks, et al. 2004) to visualize the conservation of the secondary structure.

917

### 918 *Visualization of conservation scores*

919 We used PyMOL (DeLano 2002) to map the computed conservation scores onto the  
920 solved structures of LOTUS and OSK (Jeske, et al. 2015; Jeske, et al. 2017). At the time  
921 of writing, no full-length Oskar protein structure had been reported. With the caveat that  
922 all visualization was done on the structure of the *Drosophila melanogaster* protein  
923 domains, we created a custom python script that augments PyMOL with automatic display  
924 and coloring capacities. This script is available as **Oskar\_pymol\_visualization.py**, and  
925 contains a manual at the beginning of the file. For the OSK domain, we used the structure  
926 PDBID: 5A4A, and for the LOTUS domain, PDBID: 5NT7 (Jeske, et al. 2015; Jeske, et  
927 al. 2017). The LOTUS structure we used is in complex with Vasa, and in a dimeric form  
928 (Jeske, et al. 2017), allowing for easy interpretation of the different conservation scores.  
929 For the OSK structure, we removed the residues 399-401 and 604-606 from the PDB file  
930 as those amino acids did not align across all sequences and therefore showed highly  
931 biased conservation scores.

932

### 933 *Statistical analysis*

934 All statistical analyses were performed using the scipy stats module  
935 (<https://www.scipy.org/>). Significance thresholds for p-values were set at 0.05. Statistical  
936 tests and p-values are reported in the figure legends. All statistical tests can be found in  
937 the ipython notebooks mentioned below.

938

### 939 *Data and code availability*

940 The study generated a series of python 3 script and python 3 ipython notebook files that  
941 perform the entire analysis. All the results presented in this paper can be reproduced by  
942 running the aforementioned python 3 code. The primary data, *oskar* orthologs, Oskar  
943 alignments, trees, and conservation statistics as well as the code created and used are  
944 available as supplementary information. For ease of access, legibility, and reproducibility,  
945 the code and datasets have been deposited in a GitHub repository available at  
946 [https://github.com/extavourlab/Oskar\\_Evolution](https://github.com/extavourlab/Oskar_Evolution).

947

### 948 *Software and libraries*

949 All software and libraries used in this study are published under open source libre licenses  
950 and are therefore available to any researcher.

| Type     | Name     | Version  | Source                                                                                                                                        |
|----------|----------|----------|-----------------------------------------------------------------------------------------------------------------------------------------------|
| Software | HMMER    | 3.1.b2   | <a href="http://hmmer.org/">http://hmmer.org/</a>                                                                                             |
| Software | PyMOL    | 1.8.x    | <a href="https://pymol.org">https://pymol.org</a>                                                                                             |
| Software | rsync    | 3.1.2    | <a href="http://rsync.samba.org/">http://rsync.samba.org/</a>                                                                                 |
| Software | Python 3 | 3.7      | <a href="https://www.python.org/">https://www.python.org/</a>                                                                                 |
| Software | MrBayes  | 3.2.6    | <a href="http://nbisweden.github.io/MrBayes/">http://nbisweden.github.io/MrBayes/</a>                                                         |
| Software | trimal   | 1.2rev59 | <a href="http://trimal.cgenomics.org/">http://trimal.cgenomics.org/</a>                                                                       |
| Software | transeq  | 6.6.0.0  | <a href="http://emboss.sourceforge.net/apps/cvs/emboss/apps/transeq.html">http://emboss.sourceforge.net/apps/cvs/emboss/apps/transeq.html</a> |
| Software | augustus | 2.5.5    | <a href="http://augustus.gobics.de/">http://augustus.gobics.de/</a>                                                                           |
| Software | JPred4   | 4.0      | <a href="http://www.compbio.dundee.ac.uk/jpred/">http://www.compbio.dundee.ac.uk/jpred/</a>                                                   |
| Software | RNABindR | 2.0      | <a href="http://ailab1.ist.psu.edu/RNABindR/">http://ailab1.ist.psu.edu/RNABindR/</a>                                                         |

|          |                |        |                                                                                                                       |
|----------|----------------|--------|-----------------------------------------------------------------------------------------------------------------------|
| Software | Inkscape       | 0.92.3 | <a href="https://inkscape.org/">https://inkscape.org/</a>                                                             |
| Library  | jupyter        | 4.4.0  | <a href="https://jupyter.org/">https://jupyter.org/</a>                                                               |
| Library  | ete3           | 3.3.1  | <a href="http://etetoolkit.org">http://etetoolkit.org</a>                                                             |
| Library  | pandas         | 0.25.1 | <a href="https://pandas.pydata.org/">https://pandas.pydata.org/</a>                                                   |
| Library  | mca            | 1.0.3  | <a href="https://pypi.org/project/mca/">https://pypi.org/project/mca/</a>                                             |
| Library  | fuzzywuzzy     | 0.17.0 | <a href="https://github.com/seatgeek/fuzzywuzzy">https://github.com/seatgeek/fuzzywuzzy</a>                           |
| Library  | BeautifulSoup4 | 4.6.3  | <a href="https://pypi.org/project/beautifulsoup4/">https://pypi.org/project/beautifulsoup4/</a>                       |
| Library  | biopython      | 1.74   | <a href="https://pypi.org/project/biopython/">https://pypi.org/project/biopython/</a>                                 |
| Library  | numpy          | 1.16.2 | <a href="https://www.numpy.org/">https://www.numpy.org/</a>                                                           |
| Library  | seaborn        | 0.9.0  | <a href="https://seaborn.pydata.org/">https://seaborn.pydata.org/</a>                                                 |
| Library  | matplotlib     | 3.0.0  | <a href="https://matplotlib.org/">https://matplotlib.org/</a>                                                         |
| Library  | scipy          | 1.1.0  | <a href="https://www.scipy.org/">https://www.scipy.org/</a>                                                           |
| Library  | progressbar    | 3.38.0 | <a href="https://github.com/niltonvolpato/python-progressbar">https://github.com/niltonvolpato/python-progressbar</a> |

951

952

### 953 **Acknowledgements**

954 This work was supported by funds from Harvard University, and support to SB from the  
955 Master's in Bioinformatics Program of the University of Bordeaux. We thank members of  
956 the Extavour lab for discussion.

957

## 958 **Figure Legends**

959

960 **Figure 1: Overview of Oskar protein structure.** The most common isoform of the Oskar  
961 protein, Short Oskar, is composed of two well-folded domains, LOTUS and OSK,  
962 separated by an interdomain sequence. A second isoform of the protein called Long  
963 Oskar is present in some Dipteran insects, which contains a 5' domain as well as the  
964 three domains of Short Oskar. Below the schematic representation is a rendering of the  
965 previously reported solved structures for the LOTUS (PDBID: 5NT7) and OSK (PDBID:  
966 5A4A) domains (Jeske, et al. 2015; Yang, et al. 2015) with a speculative rendering of the  
967 unfolded interdomain region shown with a dashed line

968

969 **Figure 2: Schematic presentation of the *oskar* ortholog detection pipeline.**  
970 Sequences were collected automatically from the three NCBI databases, GenBank  
971 (GCA), RefSeq (GCF) and Transcriptome Shotgun Assembly Database (TSA). RefSeq  
972 genomes were used to generate Augustus gene model HMMs, which were used to  
973 annotate and predict proteins in the non-annotated genomes obtained from GenBank.  
974 Transcripts from the TSA database were 6-frame translated using TRANSEQ. Amino acid  
975 sequences were consolidated into three protein databases. *hmmsearch* from the HMMER  
976 tool suite was used to search for LOTUS and OSK hits in those sequences. Sequences  
977 with hits for both the LOTUS and OSK domains with an E-value <0.05 were annotated as  
978 *oskar* sequences. Sequences were then cleaned to remove duplicates (sequences with  
979 <80% sequence similarity coming from the same organism). The resulting sequences  
980 were aligned using *hmmalign*, and the process was repeated until no new sequences  
981 were identified. Finally, the sequences were consolidated with the dataset metadata into  
982 the *oskar* ortholog database that was used for all subsequent analyses.

983

984 **Figure 3: Summary of *oskar* distribution and expression in insects.** Phylogeny from  
985 (Misof, et al. 2014). Symbols in order from left to right: (i) vertical rectangles: grey: no  
986 *oskar* ortholog was identified in this order. Color (unique for each order): at least one  
987 *oskar* ortholog was identified in this order. (ii) number of datasets searched. (iii) horizontal  
988 rectangles: proportion of searched datasets in which an *oskar* ortholog was identified. (iv)

989 pie chart: proportion of *oskar* sequences identified in RefSeq (GCF) datasets. (v) pie  
990 chart: proportion of *oskar* sequences identified in GenBank (GCA) datasets. (vi) pie chart:  
991 proportion of *oskar* sequences identified in Transcriptome Shotgun Assembly Database  
992 (TSA) datasets. (vii) *oskar* sequences identified in tissue related to germ line  
993 (transcriptomes derived from reproductive organs, eggs or embryos). (viii) *oskar*  
994 sequences identified in tissue related to the brain (transcriptomes derived from brain or  
995 head). (ix) *oskar* sequences identified in an egg stage transcriptome. (x) *oskar* sequences  
996 identified in a larval stage transcriptome. (xi) *oskar* sequences identified in a pupal stage  
997 transcriptome. (xii) *oskar* sequences identified in a nymphal or juvenile stage  
998 transcriptome. (xiii) *oskar* sequences identified in an adult transcriptome. All numbers  
999 represented graphically here are in Supplementary Table 1. No datasets were available  
1000 for Protura, Diplura or Isoptera at the time of analysis.

1001  
1002 **Figure 4: Phylogenetic reconstruction of hymenopteran Oskar sequences.**  
1003 Phylogenetic tree inferred using RaxML with 100 bootstraps. Each leaf represents an  
1004 Oskar ortholog. Gray circles: only one Oskar sequence was identified. Red circles:  
1005 putatively duplicated Oskar sequences identified (sequence similarity <80%). Only  
1006 families which contained a putative duplication are shown here; see Supplementary  
1007 Figure S4 for the results of our *oskar* search in the context of a more complete  
1008 hymenopteran phylogeny.

1009  
1010 **Figure 5: Differential conservation of amino acids between hemimetabolous and**  
1011 **holometabolous Oskar sequences. (a)** Box plot showing the conservation bias for each  
1012 of the LOTUS and OSK domains between hemimetabolous and holometabolous Oskar  
1013 sequences. Statistical difference was tested using a Mann Whitney U test ( $p < 0.05$ ). **(b)**  
1014 Ribbon diagram of LOTUS (PDBID: 5NT7) and OSK (PDBID: 5A4A) domain structures,  
1015 where each amino acid is colored by conservation bias on the color scale shown in **(a)**.  
1016 **(c, d)** Protein surface representation of the OSK domain (PDBID: 5A4A) from two different  
1017 angles. Black dashed lines indicate the three amino acids reported previously to be  
1018 necessary for OSK binding to RNA in *D. melanogaster* (Jeske, et al. 2015; Yang, et al.  
1019 2015). **(c)** Amino acids colored by conservation bias on the color scale shown in **(a)**.

1020 Cyan: amino acids more highly conserved in hemimetabolous sequences; magenta:  
1021 amino acids more highly conserved in holometabolous sequences. **(d)** Amino acids  
1022 colored by electrostatic conservation score. Left: hemimetabolous sequences; right:  
1023 holometabolous sequences.

1024

1025 **Figure 6: Conservation analysis of the LOTUS domain. (a)** Ribbon diagram of a  
1026 LOTUS domain dimer (cyan/magenta) in complex with two Vasa molecules (yellow)  
1027 (PDBID: 5NT7) from two different angles. Each LOTUS amino acid is colored based on  
1028 its Valdar conservation score. **(b, c)** Sequence Logo of the  $\alpha 5$  and  $\alpha 2/\alpha 3$  helices  
1029 respectively generated with WebLogo (Crooks, et al. 2004). Black: hydrophobic residues;  
1030 blue: charged residues; green: polar residues. **(b', b'')** Ribbon diagram of the conserved  
1031  $\alpha 5$  helix, with key amino acids displayed as sticks and colored by Valdar conservation  
1032 score. Two potential novel Vasa-LOTUS contacts (H227 and Q235) are highlighted with  
1033 dashed lines. **(c')** Ribbon diagram of the conserved  $\alpha 2$  helix, with key amino acids  
1034 displayed as sticks and colored by hydrophobicity/hydrophily conservation score. **(c'')**  
1035 Ribbon diagram of the conserved  $\alpha 2$  helix, with key amino acids displayed as sticks and  
1036 colored by Valdar conservation score. **(d)** Surface mesh rendering colored with the  
1037 RNABindR RNA binding conservation score. **(e, f)** Ribbon diagram of the LOTUS  $\beta$  sheet  
1038 dimerization interface. Left: conservation of monomeric LOTUS domains; right: dimeric  
1039 LOTUS domains. **(e)** Amino acids colored by electrostatic conservation score. Dashed  
1040 lines indicate the key electrostatic interaction thought to stabilize the dimerization. **(f)**  
1041 Amino acids colored by hydrophobicity/hydrophily conservation score. Dashed lines  
1042 indicate the key hydrophobic pocket thought to stabilize the dimerization.

1043

1044 **Figure 7: Conservation analysis of the OSK domain. (a)** Ribbon diagram of the OSK  
1045 domain (PDBID: 5A4A) from two different angles. Each amino acid is colored based on  
1046 its Valdar conservation score. **(b)** Protein surface representation of the OSK domain  
1047 colored by Valdar conservation, electrostatic conservation and hydrophobicity/hydrophily  
1048 conservation score. **(c, c', c'', c''')** Ribbon diagram of newly detected conserved motifs  
1049 of the OSK domain, showing sequence Logo (bottom row) residues as sticks. Each amino

1050 acid is colored with Valdar conservation scores of holometabolous (top row) and  
1051 hemimetabolous (middle row) OSK sequences. Bottom row: sequence Logos of each  
1052 conserved motif generated with WebLogo (Crooks, et al. 2004). Black: hydrophobic  
1053 residues; blue: charged residues; green: polar residues. Red numbers: amino acid  
1054 locations of *D. melanogaster* loss of function *oskar* alleles leading to the loss of *oskar*  
1055 localization to the posterior pole during embryogenesis (P425S = *osk[8]* (Kim-Ha, et al.  
1056 1991); S452L = *osk[255]* = *osk[7]* (Lehmann and Nüsslein-Volhard 1986; Kim-Ha, et al.  
1057 1991); S457F = *osk[6B10]* (Breitwieser, et al. 1996)) or to reduced RNA-binding affinity  
1058 of the OSK domain (R436E (Yang, et al. 2015)).

## 1059 References

- 1060 Ahuja A, Extavour CG. 2014. Patterns of molecular evolution of the germ line specification gene  
1061 *oskar* suggest that a novel domain may contribute to functional divergence in *Drosophila*.  
1062 *Development Genes and Evolution* 222:65-77.
- 1063 Amy RL. 1961. The embryology of *Habrobracon juglandis* (Ashmead). *Journal of Morphology*  
1064 109:199-217.
- 1065 Anantharaman V, Zhang D, Aravind L. (p15752 co-authors). 2010. OST-HTH: a novel predicted  
1066 RNA-binding domain. *Biology direct* 5:13.
- 1067 Anderson DT, Wood EC. 1968. The morphological basis of embryonic movements in the light  
1068 brown apple moth, *Epiphyas postvittana* (Walk.) (Lepidoptera, Tortricidae). *Australian Journal of*  
1069 *Zoology* 16:763-793.
- 1070 Ando H, Tanaka M. 1979. Early embryonic development of the primitive moths, *Enduclyta*  
1071 *signifer* Walker and *E. excrescens* Butler (Lepidoptera: Hepialidae). *International Journal of*  
1072 *Insect Morphology and Embryology* 9:67-77.
- 1073 Berg GJ, Gassner G. 1978. Fine structure of the blastoderm embryo of the pink bollworm,  
1074 *Pectinophora gossypiella* (Saunders) (Lepidoptera: gelechiidae). *International Journal of Insect*  
1075 *Morphology and Embryology* 1:81+105.
- 1076 Blondel L, Jones TEM, Extavour CG. 2020. Bacterial contribution to genesis of the novel germ  
1077 line determinant *oskar*. *Elife* 9:e45539.
- 1078 Breitwieser W, Markussen F-H, Horstmann H, Ephrussi A. 1996. Oskar protein interaction with  
1079 Vasa represents an essential step in polar granule assembly. *Genes and Development*:2179-  
1080 2188.
- 1081 Bronskill JF. 1959. Embryology of *Pimpla turionellae* (L.) (Hymenoptera: Ichneumonidae).  
1082 *Canadian Journal of Zoology* 37:655-688.
- 1083 Bull AL. 1982. Stages of living embryos in the jewel wasp *Mormoniella (Nasonia) vitripennis*  
1084 (Walker) (Hymenoptera: Pteromalidae). *International Journal of Insect Morphology and*  
1085 *Embryology* 1:1-23.
- 1086 Bütschli O. 1870. Zur Entwicklungsgeschichte der Biene. *Zeitschrift für Wissenschaftliche*  
1087 *Zoologie* 20:519-564.
- 1088 Butt FH. 1949. Embryology of the Milkweed Bug, *Oncopeltus fasciatus* (Hemiptera). *Cornell*  
1089 *Experiment Station Memoir* 283:2-43.
- 1090 Callebaut I, Mornon J-P. (p19296 co-authors). 2010. LOTUS, a new domain associated with  
1091 small RNA pathways in the germline. *Bioinformatics* 26:1140-1144.
- 1092 Capella-Gutierrez S, Silla-Martinez JM, Gabaldon T. 2009. trimAl: a tool for automated  
1093 alignment trimming in large-scale phylogenetic analyses. *Bioinformatics* 25:1972-1973.
- 1094 Capra JA, Singh M. 2007. Predicting functionally important residues from sequence  
1095 conservation. *Bioinformatics* 23:1875-1882.

- 1096 Carter J-M, Baker SC, Pink R, Carter DRF, Collins A, Tomlin J, Gibbs M, Breuker CJ. 2013.  
1097 Unscrambling butterfly oogenesis. *BioMedCentral Genomics* 14:283-283.
- 1098 Carter JM, Gibbs M, Breuker CJ. 2015. Divergent RNA Localisation Patterns of Maternal Genes  
1099 Regulating Embryonic Patterning in the Butterfly *Pararge aegeria*. *PLoS ONE* 10:e0144471.
- 1100 Chang CC, Lee WC, Cook CE, Lin GW, Chang T. 2006. Germ-plasm specification and germline  
1101 development in the parthenogenetic pea aphid *Acyrtosiphon pisum*: *Vasa* and *Nanos* as  
1102 markers. *International Journal of Developmental Biology* 50:413-421.
- 1103 Chen X-x, Achterberg Cv. 2018. Systematics, Phylogeny, and Evolution of Braconid Wasps: 30  
1104 Years of Progress. *Annual Review of Entomology* 64:1-24.
- 1105 Clark AG, Eisen MB, Smith DR, Bergman CM, Oliver B, Markow TA, Kaufman TC, Kellis M,  
1106 Gelbart W, Iyer VN, et al. (p04187 co-authors). 2007. Evolution of genes and genomes on the  
1107 *Drosophila* phylogeny. *Nature* 450:203-218.
- 1108 Crooks GE, Hon G, Chandonia JM, Brenner SE. 2004. WebLogo: a sequence logo generator.  
1109 *Genome Research* 14:1188-1190.
- 1110 Dearden PK. 2006. Germ cell development in the Honeybee (*Apis mellifera*); *vasa* and *nanos*  
1111 expression. *BMC Developmental Biology* 6:6.
- 1112 Dearden PK, Wilson MJ, Sablan L, Osborne PW, Havler M, McNaughton E, Kimura K, Milshina  
1113 NV, Hasselmann M, Gempe T, et al. 2006. Patterns of conservation and change in honey bee  
1114 developmental genes. *Genome Research* 16:1376-1384.
- 1115 DeLano WL. 2002. Pymol: An Open-Source Molecular Graphics Tool. *CCP4 Newsletter on*  
1116 *Protein Crystallography* 40:82-92.
- 1117 Donnell DM, Corley LS, Chen G, Strand MR. 2004. Caste determination in a polyembryonic  
1118 wasp involves inheritance of germ cells. *Proceedings of the National Academy of Sciences of*  
1119 *the United States of America* 101:10095-10100.
- 1120 Drozdetskiy A, Cole C, Procter J, Barton GJ. 2015. JPred4: a protein secondary structure  
1121 prediction server. *Nucleic Acids Research* 43:W389-394.
- 1122 Eastham LES. 1930. The embryology of *Pieris rapae* - Organogeny. *Philosophical Transactions*  
1123 *of the Royal Society of London. Series B: Biological Sciences* 219:1-50.
- 1124 Edgar RC. (r20416 co-authors). 2004. MUSCLE: a multiple sequence alignment method with  
1125 reduced time and space complexity. *BMC Bioinformatics* 5:113.
- 1126 Ephrussi A, Lehmann R. 1992. Induction of germ cell formation by *oskar*. *Nature* 358:387-392.
- 1127 Ewen-Campen B, Schwager EE, Extavour CG. 2010. The molecular machinery of germ line  
1128 specification. *Molecular Reproduction and Development* 77:3-18.
- 1129 Ewen-Campen B, Srouji JR, Schwager EE, Extavour CG. 2012. *oskar* Predates the Evolution of  
1130 Germ Plasm in Insects. *Current Biology* 22:2278-2283.

- 1131 Extavour CG, Akam ME. 2003. Mechanisms of germ cell specification across the metazoans:  
1132 epigenesis and preformation. *Development* 130:5869-5884.
- 1133 Field J, Ohi M, Kennedy M. 2011. A molecular phylogeny for digger wasps in the tribe  
1134 *Ammophilini* (Hymenoptera, Apoidea, Sphecidae). *Systematic Entomology* 36:732-740.
- 1135 Fleig R, Sander K. 1985. Blastoderm development in honey bee embryogenesis as seen in the  
1136 scanning electron microscope. *International Journal of Invertebrate Reproduction and*  
1137 *Development* 8:279-286.
- 1138 Fleig R, Sander K. 1986. Embryogenesis of the Honeybee *Apis mellifera* L (Hymenoptera,  
1139 Apidae) - an SEM Study. *International Journal of Insect Morphology and Embryology* 15:449-  
1140 462.
- 1141 Fleischmann VG. 1975. Origin and embryonic development of fertile gonads with and without  
1142 pole cells of *Pimpla turionellae* L. (Hymenoptera, Ichneumonidae). *Zool. Jb. Anat. Bd.* 94:375-  
1143 411.
- 1144 Gatenby JB. 1920. The Cytoplasmic Inclusions of the Germ Cells. Part VI. On the origin and  
1145 probable constitution of the germ-cell determinant of *Apanteles glomeratus*, with a note on the  
1146 secondary nuclei. *Quarterly Journal of Microscopical Science* 64:133-153.
- 1147 Gatenby JB. 1917a. The embryonic development of *Trichogramma evanescens* Westw.,  
1148 monoembryonic egg parasite of *Donacia simplex*. *Quarterly Journal of Microscopical Science*  
1149 62:149-187.
- 1150 Gatenby JB. 1918. The segregation of germ cells in *Trichogramma evanescens*. *Quarterly*  
1151 *Journal of Microscopical Science* 63:161-173.
- 1152 Gatenby JB. 1917b. The segregation of the germ-cells in *Trichogramma evanescens*. *Quarterly*  
1153 *Journal of Microscopical Science* 62:149-187.
- 1154 Grbic' M. 2000. "Alien" wasps and evolution of development. *Bioessays* 22:920-932.
- 1155 Grbic' M. 2003. Polyembryony in parasitic wasps: evolution of a novel mode of development.  
1156 *International Journal of Developmental Biology* 47:633-642.
- 1157 Grbic' M, Nagy LM, Carroll SB, Strand M. 1996. Polyembryonic development: insect pattern  
1158 formation in a cellularised environment. *Development*:795-804.
- 1159 Guelin M. 1994. [Activity of W-sex heterochromatin and accumulation of the nuage in nurse  
1160 cells of the lepidopteran *Ephesia*]. *C. R. Acad. Sci. Paris. Ser. III* 317:54-61.
- 1161 Gutzeit HO, Zissler D, Fleig R. 1993. Oogenesis in the Honeybee *Apis mellifera* - Cytological  
1162 Observations on the Formation and Differentiation of Previtellogenic Ovarian Follicles. *Roux's*  
1163 *Archives of Developmental Biology* 202:181-191.
- 1164 Hamming RW. 1950. Error Detecting and Error Correcting Codes. *The Bell System Technical*  
1165 *Journal* 29:147-160.

- 1166 Hay B, Jan LY, Jan YN. 1990. Localization of *vasa*, a component of *Drosophila* polar granules,  
1167 in maternal-effect mutants that alter embryonic anteroposterior polarity. *Development* 109:425-  
1168 433.
- 1169 Hegner RW. 1914. Studies on germ cells. III. The origin of the Keimbahn-determinants in a  
1170 parasitic Hymenopteran, *Copidosoma*. *Anatomischer Anzeiger* 3-4:51-69.
- 1171 Heming BS, Huebner E. 1994. Development of the Germ Cells and Reproductive Primordia in  
1172 Male and Female Embryos of *Rhodnius prolixus* Stal (Hemiptera, Reduviidae). *Canadian*  
1173 *Journal of Zoology* 72:1100-1119.
- 1174 Huerta-Cepas J, Serra F, Bork P. 2016. ETE 3: Reconstruction, Analysis, and Visualization of  
1175 Phylogenomic Data. *Molecular Biology and Evolution* 33:1635-1638.
- 1176 Jeske M, Bordi M, Glatt S, Muller S, Rybin V, Muller CW, Ephrussi A. 2015. The Crystal  
1177 Structure of the *Drosophila* Germline Inducer Oskar Identifies Two Domains with Distinct Vasa  
1178 Helicase- and RNA-Binding Activities. *Cell Reports* 12:587-598.
- 1179 Jeske M, Muller CW, Ephrussi A. 2017. The LOTUS domain is a conserved DEAD-box RNA  
1180 helicase regulator essential for the recruitment of Vasa to the germ plasm and nuage. *Genes*  
1181 *and Development* 31:939-952.
- 1182 Johannsen OA. 1929. Some phases in the embryonic development of *Diacrisia virginica* Fabr.  
1183 (Lepidoptera). *J. Morphol. Physiol.* 2:493-541.
- 1184 Jones JR, Macdonald PM. 2007. Oskar controls morphology of polar granules and nuclear  
1185 bodies in *Drosophila*. *Development* 134:233-236.
- 1186 Juhn J, James AA. 2006. *oskar* gene expression in the vector mosquitoes, *Anopheles gambiae*  
1187 and *Aedes aegypti*. *Insect Molecular Biology* 15:363-372.
- 1188 Juhn J, Marinotti O, Calvo E, James AA. 2008. Gene structure and expression of *nanos* (*nos*)  
1189 and *oskar* (*osk*) orthologues of the vector mosquito, *Culex quinquefasciatus*. *Insect Molecular*  
1190 *Biology* 17:545-552.
- 1191 Kawahara AY, Plotkin D, Espeland M, Meusemann K, Toussaint EFA, Donath A, Gimnich F,  
1192 Frandsen PB, Zwick A, Dos Reis M, et al. 2019. Phylogenomics reveals the evolutionary timing  
1193 and pattern of butterflies and moths. *Proceedings of the National Academy of Sciences of the*  
1194 *United States of America* 116:22657-22663.
- 1195 Kelly GM, Huebner E. 1989. Embryonic development of the hemipteran insect *Rhodnius*  
1196 *prolixus*. *Journal of Morphology* 199:175-196.
- 1197 Khila A, Abouheif E. 2008. Reproductive constraint is a developmental mechanism that  
1198 maintains social harmony in advanced ant societies. *Proceedings of the National Academy of*  
1199 *Sciences of the United States of America* 105:17884-17889.
- 1200 Kim-Ha J, Smith JL, Macdonald PM. 1991. *oskar* mRNA is localized to the posterior pole of the  
1201 *Drosophila* oocyte. *Cell* 66:23-35.

- 1202 Kirk DL. 2005. A twelve-step program for evolving multicellularity and a division of labor.  
1203 *Bioessays* 27:299-310.
- 1204 Kobayashi Y, Ando H. 1984. Mesodermal Organogenesis in the Embryo of the Primitive Moth,  
1205 *Neomicropteryx nipponensis* Issiki (Lepidoptera, Micropterygidae). *Journal of Morphology*  
1206 181:29-47.
- 1207 Koscielska MK, Koscielski B. 1987. Early embryonic development of *Tritneptis diprionis*  
1208 (Chalcidoidea, Hymenoptera). In: Ando H, Jura C, editors. *Recent Advances in Insect*  
1209 *Embryology in Japan and Poland*. Tsukuba: Arthropod. Embryol. Soc. Jpn.
- 1210 ISEBU Co. Ltd. p. 207-214.
- 1211 Lasko P. 2013. The DEAD-box helicase Vasa: evidence for a multiplicity of functions in RNA  
1212 processes and developmental biology. *Biochimica et Biophysica Acta* 1829:810-816.
- 1213 Lautenschlager F. 1932. Die Embryonalentwicklung der weiblichen Keimdrüse bei der Psychide  
1214 *Solenobia triquetella*. *Zool. Jarh.* 56:121-162.
- 1215 Lebart L, Morineau A, Warwick KM. 1984. *Multivariate Descriptive Statistical Analysis:*  
1216 *Correspondence Analysis and Related Techniques for Large Matrices*. Chichester, UK: John  
1217 Wiley & Sons.
- 1218 Lehmann R. 2016. Germ Plasm Biogenesis--An Oskar-Centric Perspective. *Current Topics in*  
1219 *Developmental Biology* 116:679-707.
- 1220 Lehmann R, Nüsslein-Volhard C. 1986. Abdominal Segmentation, Pole Cell Formation, and  
1221 Embryonic Polarity Require the Localized Activity of *oskar*, a Maternal Gene in *Drosophila*. *Cell*  
1222 47:144-152.
- 1223 Lin GW, Cook CE, Miura T, Chang CC. 2014. Posterior localization of ApVas1 positions the  
1224 preformed germ plasm in the sexual oviparous pea aphid *Acyrtosiphon pisum*. *EvoDevo* 5:18.
- 1225 Lin J. 1991. Divergence Measures Based on the Shannon Entropy. *IEEE Transactions on*  
1226 *Information Theory / Professional Technical Group on Information Theory* 37:145-151.
- 1227 Loytynoja A. 2014. Phylogeny-aware alignment with PRANK. *Methods in Molecular Biology*  
1228 1079:155-170.
- 1229 Lynch JA, Desplan C. (p16123 co-authors). 2010. Novel modes of localization and function of  
1230 *nanos* in the wasp *Nasonia*. *Development* 137:3813-3821.
- 1231 Lynch JA, Özüak O, Khila A, Abouheif E, Desplan C, Roth S. 2011. The Phylogenetic Origin of  
1232 *oskar* Coincided with the Origin of Maternally Provisioned Germ Plasm and Pole Cells at the  
1233 Base of the Holometabola. *PLoS Genetics* 7:e1002029.
- 1234 Maddison DR, Schultz K-S, Maddison WP. 2007. The Tree of Life Web Project. *Zootaxa*  
1235 1668:19-40.
- 1236 Madeira F, Park YM, Lee J, Buso N, Gur T, Madhusoodanan N, Basutkar P, Tivey ARN, Potter  
1237 SC, Finn RD, et al. 2019. The EMBL-EBI search and sequence analysis tools APIs in 2019.  
1238 *Nucleic Acids Research* 47:W636-W641.

- 1239 Malm T, Nyman T. 2015. Phylogeny of the symphytan grade of Hymenoptera: new pieces into  
1240 the old jigsaw(fly) puzzle. *Cladistics* 31:1-17.
- 1241 Markussen FH, Michon AM, Breitwieser W, Ephrussi A. 1995. Translational control of *oskar*  
1242 generates short OSK, the isoform that induces pole plasm assembly. *Development* 121:3723-  
1243 3732.
- 1244 Mellanby H. 1935. The early embryonic development of *Rhodnius prolixus* (Hemiptera,  
1245 Heteroptera). *Quarterly Journal of Microscopical Science* 78:71-90.
- 1246 Metschnikoff E. 1866. Embryologische Studien an Insekten. *Zeit. f. wiss Zool.* 16:389-500.
- 1247 Misof B, Liu S, Meusemann K, Peters RS, Donath A, Mayer C, Frandsen PB, Ware J, Flouri T,  
1248 Beutel RG, et al. 2014. Phylogenomics resolves the timing and pattern of insect evolution.  
1249 *Science* 346:763-767.
- 1250 Mitter C, Davis DR, Cummings MP. 2017. Phylogeny and Evolution of Lepidoptera. *Annual*  
1251 *Review of Entomology* 62:265-283.
- 1252 Miura T, Braendle C, Shingleton A, Sisk G, Kambhampati S, Stern DL. 2003. A comparison of  
1253 parthenogenetic and sexual embryogenesis of the pea aphid *Acyrtosiphon pisum* (Hemiptera :  
1254 Aphidoidea). *Journal of Experimental Zoology Part B-Molecular and Developmental Evolution*  
1255 295B:59-81.
- 1256 Miya K. 1953. The presumptive genital region at the blastoderm stage of the silkworm egg.  
1257 *Journal of the Faculty of Agriculture of Iwate University*:223-227.
- 1258 Miya K. 1958. Studies on the embryonic development of the gonad in the silkworm, *Bombyx*  
1259 *mori* L. Part I. Differentiation of germ cells. *Journal of the Faculty of Agriculture of Iwate*  
1260 *University* 3:436-467.
- 1261 Miya K. 1975. Ultrastructural changes of embryonic cells during organogenesis in the silkworm,  
1262 *Bombyx mori*. I. The Gonad. *Journal of the Faculty of Agriculture of Iwate University* 12:329-  
1263 338.
- 1264 Moon CP, Fleming KG. 2011. Side-chain hydrophobicity scale derived from transmembrane  
1265 protein folding into lipid bilayers. *Proceedings of the National Academy of Sciences of the*  
1266 *United States of America* 108:10174-10177.
- 1267 Nagy L, Riddiford L, Kiguchi K. 1994. Morphogenesis in the Early Embryo of the Lepidopteran  
1268 *Bombyx mori*. *Developmental Biology*:137-151.
- 1269 Nakao H. 1999. Isolation and characterization of a *Bombyx vasa*-like gene. *Development Genes*  
1270 *and Evolution* 209:312-316.
- 1271 Nakao H, Hatakeyama M, Lee JM, Shimoda M, Kanda T. 2006. Expression pattern of *Bombyx*  
1272 *vasa*-like (BmVLG) protein and its implications in germ cell development. *Development Genes*  
1273 *and Evolution* 216:94-99.

- 1274 Nakao H, Matsumoto T, Oba Y, Niimi T, Yaginuma T. 2008. Germ cell specification and early  
1275 embryonic patterning in *Bombyx mori* as revealed by nanos orthologues. *Evolution and*  
1276 *Development* 10:546-554.
- 1277 Nakao H, Takasu Y. 2019. Complexities in *Bombyx* germ cell formation process revealed by  
1278 *Bm-nosO* (a *Bombyx* homolog of nanos) knockout. *Developmental Biology* 445:29-36.
- 1279 Nelson JA. 1915. *The embryology of the honey bee*. Princeton: Princeton University Press.
- 1280 Noce T, Okamoto-Ito S, Tsunekawa N. 2001. *Vasa* homolog genes in mammalian germ cell  
1281 development. *Cell Structure and Function* 26:131-136.
- 1282 Nyman T, Zinovjev AG, Vikberg V, Farrell BD. 2006. Molecular phylogeny of the sawfly  
1283 subfamily Nematinae (Hymenoptera: Tenthredinidae). *Systematic Entomology* 31:569-583.
- 1284 Pal D, Chakrabarti P. 2001. Non-hydrogen bond interactions involving the methionine sulfur  
1285 atom. *Journal of Biomolecular Structure and Dynamics* 19:115-128.
- 1286 Peters RS, Krogmann L, Mayer C, Donath A, Gunkel S, Meusemann K, Kozlov A,  
1287 Podsiadlowski L, Petersen M, Lanfear R, et al. 2017. Evolutionary History of the Hymenoptera.  
1288 *Current Biology* 27:1013-1018.
- 1289 Peters RS, Niehuis O, Gunkel S, Bläser M, Mayer C, Podsiadlowski L, Kozlov A, Donath A,  
1290 Noort Sv, Liu S, et al. 2018. Transcriptome sequence-based phylogeny of chalcidoid wasps  
1291 (Hymenoptera: Chalcidoidea) reveals a history of rapid radiations, convergence, and  
1292 evolutionary success. *Molecular Phylogenetics and Evolution* 120:286-296.
- 1293 Presser BD, Rutschky CW. 1957. The embryonic development of the corn earworm, *Heliothis*  
1294 *zea* (Boddie) (Lepidoptera, Phalaenidae). *Annals of the Entomological Society of America*  
1295 50:133-164.
- 1296 Prous M, Blank SM, Goulet H, Heibo E, Liston A, Malm T, Nyman T, Schmidt S, Smith DR,  
1297 Vårdal H, et al. 2014. The genera of Nematinae (Hymenoptera, Tenthredinidae). *Journal of*  
1298 *Hymenoptera Research* 40:1-69.
- 1299 Quan H, Arsala D, Lynch JA. 2019. Transcriptomic and functional analysis of the oosome, a  
1300 unique form of germ plasm in the wasp *Nasonia vitripennis*. *BMC Biology* 17:78.
- 1301 Quan H, Lynch JA. 2016. The evolution of insect germline specification strategies. *Current*  
1302 *Opinion in Insect Science* 13:99-105.
- 1303 Rafiqi AM, Rajakumar A, Abouheif E. 2020. Origin and elaboration of a major evolutionary  
1304 transition in individuality. *Nature* 585:239-244.
- 1305 Rausell A, Juan D, Pazos F, Valencia A. 2010. Protein interactions and ligand binding: from  
1306 protein subfamilies to functional specificity. *Proceedings of the National Academy of Sciences of*  
1307 *the United States of America* 107:1995-2000.
- 1308 Raz E. 2000. The function and regulation of *vasa*-like genes in germ-cell development. *Genome*  
1309 *Biology* 1:1-6.

- 1310 Saito. 1937. On the development of the Tusser, *Antheraea pernyi* Guerin-Meneville, with special  
1311 reference to the comparative embryology of insects. Journal of the Faculty of Agriculture of  
1312 Hokkaido Imperial University 40:35-109.
- 1313 Schmidt C. 2013. Molecular phylogenetics of ponerine ants (Hymenoptera: Formicidae:  
1314 Ponerinae). Zootaxa 3647:201-250.
- 1315 Schroder R. 2006. *vasa* mRNA accumulates at the posterior pole during blastoderm formation in  
1316 the flour beetle *Tribolium castaneum*. Development, Genes and Evolution 216:277-283.
- 1317 Schwangart F. 1905. Zur Entwicklungsgeschichte der Lepidopteren. Biol. Centralbl. 25:777-  
1318 789.
- 1319 Sehl A. 1931. Furchung und Bildung der Keimanlage bei der Mehlmotte *Ephestia kuehniella*.  
1320 Zell. Zeit. Morph. U. Okol. 1:429-506.
- 1321 Shafiq SA. 1954. A study of the embryonic development of the Gooseberry Sawfly, *Pteronidea*  
1322 *ribesii*. Quarterly Journal of Microscopical Science 95:93-114.
- 1323 Sharanowski BJ, Ridenbaugh RD, Piekarski PK, Broad GR, Burke GR, Deans AR, Lemmon AR,  
1324 Lemmon ECM, Diehl GJ, Whitfield JB, et al. 2021. Phylogenomics of Ichneumonoidea  
1325 (Hymenoptera) and implications for evolution of mode of parasitism and viral endogenization.  
1326 Molecular Phylogenetics and Evolution 156:107023.
- 1327 Sikosek T, Chan HS. 2014. Biophysics of protein evolution and evolutionary protein biophysics.  
1328 Journal of the Royal Society, Interface / the Royal Society 11:20140419.
- 1329 Sikosek T, Chan HS, Bornberg-Bauer E. 2012. Escape from Adaptive Conflict follows from  
1330 weak functional trade-offs and mutational robustness. Proceedings of the National Academy of  
1331 Sciences of the United States of America 109:14888-14893.
- 1332 Silvestri F. 1906. Contribuzioni alla conoscenza biologica degli Imenotteri parassiti. I. Biologia  
1333 del *Litomastix truncellatus* Dalm. Annali della r. Scuola Superiore di Agricoltura in Portici 6:3-51.
- 1334 Silvestri F. 1908. Contribuzioni alla conoscenza degli Imenotteri parassiti. Bollettino del  
1335 Laboratorio di Zoologia Generale e Agraria della r. Scuola Superiore d'Agricoltura (AFTW.  
1336 Facoltà Agraria) in Portici 3:29-84.
- 1337 Stamatakis A. 2014. RAxML version 8: a tool for phylogenetic analysis and post-analysis of  
1338 large phylogenies. Bioinformatics 30:1312-1313.
- 1339 Stanke M, Keller O, Gunduz I, Hayes A, Waack S, Morgenstern B. 2006. AUGUSTUS: ab initio  
1340 prediction of alternative transcripts. Nucleic Acids Research 34:W435-439.
- 1341 Strand MR, Grbic' M. 1997. The Development and Evolution of Polyembryonic Insects. Current  
1342 Topics in Developmental Biology 35:121-159.
- 1343 Sumitani M, Yamamoto DS, Oishi K, Lee JM, Hatakeyama M. 2003. Germline transformation of  
1344 the sawfly, *Athalia rosae* (Hymenoptera: Symphyta), mediated by a piggyBac-derived vector.  
1345 Insect Biochem Mol Biol 33:449-458.

- 1346 Tanaka M. 1987. Differentiation and behaviour of Primordial Germ Cells during the Early  
1347 Embryonic Development of *Parnassius glacialis* Butler, *Luehdorfia japonica* Leech and *Byasa*  
1348 (*Atrophaneura*) *alcinous alcinous* Klug (Lepidoptera: Papilionidae). In: Ando H, Jura C, editors.  
1349 Recent Advances in Insect Embryology in Japan and Poland. Tsukuba: Arthropod. Embryol.  
1350 Soc. Jpn.
- 1351 ISEBU Co. Ltd. p. 255-266.
- 1352 Tawfik MFS. 1957. Alkaline phosphatase in the germ-cell determinant of the egg of *Apanteles*.  
1353 Journal of Insect Physiology 1:286-291.
- 1354 Terribilini M, Sander JD, Lee JH, Zaback P, Jernigan RL, Honavar V, Dobbs D. 2007.  
1355 RNABindR: a server for analyzing and predicting RNA-binding sites in proteins. Nucleic Acids  
1356 Research 35:W578-584.
- 1357 Tomaya K. 1902. On the embryology of the silkworm. Bulletin of the College of Agriculture,  
1358 Tokyo 5:73-111.
- 1359 Toshiki T, Chantal C, R., Toshio K, Eappen A, Mari K, Natuo K, Jean-Luc T, Bernard M, Gérard  
1360 C, Paul S, et al. 2000. Germline transformation of the silkworm *Bombyx mori* L. using a  
1361 piggyBac transposon-derived vector. Nature Biotech.:81-84.
- 1362 Valdar WS. 2002. Scoring residue conservation. Proteins 48:227-241.
- 1363 Vilhelmsen L. 2015. Morphological phylogenetics of the Tenthredinidae (Insecta:Hymenoptera).  
1364 Invertebrate Systematics 29:164-190.
- 1365 Ward PS. 2014. The Phylogeny and Evolution of Ants. Annual Review of Ecology, Evolution,  
1366 and Systematics 45:23-43.
- 1367 Ward PS, Blaimer BB, Fisher BL. 2016. A revised phylogenetic classification of the ant  
1368 subfamily Formicinae (Hymenoptera: Formicidae), with resurrection of the genera *Colobopsis*  
1369 and *Dinomyrmex*. Zootaxa 4072:343-357.
- 1370 Webster PJ, Suen J, Macdonald PM. 1994. *Drosophila virilis oskar* transgenes direct body  
1371 patterning but not pole cell formation or maintenance of mRNA localization in *D. melanogaster*.  
1372 Development 120:2027-2037.
- 1373 Wiegmann BM, Trautwein MD, Winkler IS, Barr NB, Kim J-W, Lambkin C, Bertone MA, Cassel  
1374 BK, Bayless KM, Heimberg AM, et al. (r40919 co-authors). 2011. Episodic radiations in the fly  
1375 tree of life. Proceedings of the National Academy of Sciences 108:5690-5695.
- 1376 Will L. 1888. Entwicklungsgeschichte der viviparen Aphiden. Zool. Jarh. 3:201-280.
- 1377 Witlaczil E. 1884. Entwicklungsgeschichte der Aphiden. Zeit. f. wiss Zool. 40:559-690.
- 1378 Woodworth CW. 1889. Studies on the embryological development of *Eu Vanessa antiopa*. In:  
1379 Scudder, editor. Butterflies of Eastern United States and Canada. p. 102.
- 1380 Xu X, Brechbiel JL, Gavis ER. 2013. Dynein-Dependent Transport of *nanos* RNA in *Drosophila*  
1381 Sensory Neurons Requires Rumpelstiltskin and the Germ Plasm Organizer Oskar. Journal of  
1382 Neuroscience 33:14791-14800.

- 1383 Yang N, Yu Z, Hu M, Wang M, Lehmann R, Xu RM. 2015. Structure of *Drosophila* Oskar  
1384 reveals a novel RNA binding protein. Proceedings of the National Academy of Sciences of the  
1385 United States of America 112:11541-11546.
- 1386 Zhurov V, Terzin T, Grbic M. 2004. Early blastomere determines embryo proliferation and caste  
1387 fate in a polyembryonic wasp. Nature 432:764-769.
- 1388 Zissler D. 1992. From egg to pole cells: ultrastructural aspects of early cleavage and germ cell  
1389 determination in insects. Micr. Res. and Tech.:49-74.
- 1390

1391 **Figure 1**



1392  
1393  
1394

1395 **Figure 2**  
1396

**1 Collect available sequences datasets from NCBI and generate amino acid sequences databases**



1397

1398 **Figure 3**  
1399



1400



1403 **Figure 5**



1404



1407 **Figure 7**



1408

1409

## Supplementary Materials

1410

1411 **Evolution of a cytoplasmic determinant: evidence for the biochemical basis of**  
1412 **functional evolution of a novel germ line regulator**

1413

1414 *Leo Blondel, Savandara Besse and Cassandra G. Extavour*

1415

1416 These Supplementary Materials contain the following:

- 1417 • Supplementary Tables S1 through S5
- 1418 • Supplementary Figures S1 through S9

1419

1420

## 1421 **Supplementary Table Legends**

1422

1423 **Supplementary Table S1: Number of *oskar* sequences identified per order and per**  
1424 **data source.** Each row corresponds to an order and a data source: GCF: RefSeq; GCA:  
1425 GenBank, TSA: Transcriptome Shotgun Assembly Database. “Filtered hits” column  
1426 indicates the number of hits after the filtration algorithm described in the Methods is  
1427 applied. Rightmost column defines the proportion of *oskar* sequences identified, as the  
1428 number of datasets with a filtered hit divided by the total number of datasets searched.

1429

1430 **Supplementary Table S2: Genome quality correlation to *oskar* identification.** Mean  
1431 and median values for the distributions of each indicated genome quality parameter, in  
1432 which *oskar* was (a) or was not (b) identified. The means of both distributions are  
1433 significantly different for all metrics (Mann Whitney U test,  $p < 0.05$ ). See Supplementary  
1434 Figure S2 of graphical representation of distributions.

1435

1436

1437 **Supplementary Table S3. Assignment of metadata to germ line or brain categories.**  
1438 This table is found in  
1439 ***Data>02\_oskar\_analyses/2/3/TableS3\_germline\_brain\_table.csv*** at the GitHub  
1440 repository [https://github.com/extavourlab/Oskar\\_Evolution](https://github.com/extavourlab/Oskar_Evolution).

1441

1442 **Supplementary Table S4. Models used to create protein sequence databases.** This  
1443 table shows which models were used to run the *ab initio* gene detection algorithm  
1444 Augustus as described in Methods and Materials. Column order corresponds to any GCA  
1445 dataset of an organism from this order. “Family” column is only used if a member of this  
1446 order but of a different family was used. Finally, “augustus\_model” shows which GCF  
1447 dataset or premade augustus model, was used to run the gene prediction. This table is  
1448 found in ***Data>Tables>TableS4\_models.csv*** at the GitHub repository  
1449 [https://github.com/extavourlab/Oskar\\_Evolution](https://github.com/extavourlab/Oskar_Evolution).

1450

1451 **Supplementary Table S5. *oskar* search results master table.** This table summarizes  
1452 all results of the *oskar* search performed on each dataset. Each row corresponds to a  
1453 dataset. Columns are as follows: Id: the dataset NCBI identifier; Species: the organism’s  
1454 species name; Family\_name: the organism’s family name; Order\_name: the organism’s  
1455 order name; Hits: the number of sequences in the dataset found that satisfy our criteria  
1456 for *oskar* orthology; Source: the NCBI database from which this dataset was downloaded;  
1457 Filtered\_hits: the number of *oskar* sequins in remaining the dataset after the filtration  
1458 process was applied to all identified *oskar* sequences. For more information on the criteria  
1459 used for *oskar* orthology and the filtration process, please see the Materials and Methods  
1460 “*Identification of oskar orthologs*”. This table is found in  
1461 ***Data>Tables>TableS5\_models.csv*** at the GitHub repository  
1462 [https://github.com/extavourlab/Oskar\\_Evolution](https://github.com/extavourlab/Oskar_Evolution).

1463

## 1464 **Supplementary Figure Legends**

1465

### 1466 **Supplementary Figure S1: Summary statistics of the search for *oskar* orthologs.**

1467 **(a)** Summary of searches and results for each of the three sources of data searched, from  
1468 left to right: (i) The total number of datasets searched from all three sources (TSA:  
1469 Transcriptome Shotgun Assembly Database; GCA: GenBank; GCF: RefSeq); (ii) the  
1470 number of filtered *oskar* sequences identified in each of those datasets; and (iii) the  
1471 proportion of filtered *oskar* sequences identified in each of the three sources. **(b)**  
1472 Summary statistics broken down by insect orders. Only orders where an *oskar* sequence  
1473 was identified are shown. From left to right: (iv) The number of *oskar* sequences identified  
1474 in each of the three data sources; (v) the total number of filtered *oskar* sequences  
1475 identified per order; (vi) the proportion of all searched datasets per order where an *oskar*  
1476 sequences was identified. See also Supplementary Table 1

1477

### 1478 **Supplementary Figure S2: Genome and transcriptome quality correlation to *oskar***

1479 **identification.** Shown are box plots of the distribution of *oskar* orthologs identified  
1480 (ortholog identified or not identified) with respect to multiple genome and transcriptome  
1481 quality metrics. For each metric, the means of both distributions were tested for significant  
1482 differences using a Mann Whitney U test. A bar with an \* is displayed if the p-value was  
1483 less than 0.05. Mean and median values presented in Supplementary Table S2.

1484

### 1485 **Supplementary Figure S3: Evidence for loss of *oskar* in Lepidoptera.**

1486 the Lepidoptera as per (Kawahara, et al. 2019). Next to each lepidopteran family are  
1487 shown summary data regarding the status of *oskar* identification in our searches. Symbols  
1488 with column labels in order from left to right: (i) vertical rectangles: grey: no *oskar* ortholog  
1489 was identified in this family; range: at least one *oskar* ortholog was identified in this order.  
1490 (ii) number of datasets searched. (iii) horizontal rectangles: proportion of searched  
1491 datasets in which an *oskar* ortholog was identified; colors as in (i); numbers and  
1492 proportions at right. (iv) pie chart: proportion of *oskar* sequences identified in RefSeq  
1493 (GCF) datasets; numbers and proportions at right. (v) pie chart: proportion of *oskar*  
1494 sequences identified in GenBank (GCA) datasets; numbers and proportions at right. (vi)  
1495 pie chart: proportion of *oskar* sequences identified in Transcriptome Shotgun Assembly  
1496 Database (TSA) datasets; numbers and proportions at right. Circles to the right of some  
1497 family names indicate that there is literature evidence for involvement of germ plasm  
1498 (black) or no germ plasm (white) in germ cell specification. Numbers to the left of the  
1499 circles indicate references to the primary literature as follows: [1]: (Kobayashi and Ando  
1500 1984); [2] (Ando and Tanaka 1979); [3] (Lautenschlager 1932); [4] (Anderson and Wood  
1501 1968); [5] (Tanaka 1987); [6] (Woodworth 1889); [7] (Eastham 1930); [8] (Berg and  
1502 Gassner 1978); [9-10] (Sehl 1931; Guelin 1994); [11] (Johannsen 1929); [12] (Presser  
1503 and Rutschky 1957); [13-23]: (Tomaya 1902; Schwangart 1905; Saito 1937; Miya 1953,  
1504 1958, 1975; Nakao 1999; Toshiki, et al. 2000; Nakao, et al. 2006; Nakao, et al. 2008;  
1505 Nakao and Takasu 2019). No datasets were available for Urudidea, Sesidea, Alucitidea,  
1506 Callidulidea, Mimallonidea, Drepanidea or Lasiocampidea at the time of analysis.

1507

### 1508 **Supplementary Figure S4: Evidence for duplication of *oskar* in Hymenoptera.**

1509 Phylogenetic tree of all hymenopteran *Oskar* sequences inferred using RaxML with 100

1510 bootstraps. Branch length normalized to show only the topology. Each leaf is an Oskar  
1511 ortholog. Gray: only one Oskar sequence was identified in this species. Red: putatively  
1512 duplicated Oskar sequences (sequence similarity < 80%; see Methods). Families  
1513 containing *oskar* duplications are highlighted as per Figure 4.

1514  
1515 **Supplementary Figure S5: Tissue and developmental stage metadata analysis of**  
1516 ***oskar* identification in transcriptome datasets. (a)** Proportion of analyzed datasets that  
1517 were sequenced from the developmental stages indicated on the Y axis. **(b)** Proportion  
1518 of analyzed datasets per developmental stage in which an *oskar* ortholog was identified  
1519 (red). **(c)** Proportion of analyzed datasets that were sequenced from the tissue type  
1520 indicated on the Y axis. **(d)** Proportion of analyzed datasets per tissue type in which an  
1521 *oskar* ortholog was identified (red)

1522  
1523 **Supplementary Figure S6: Multiple Correspondence Analysis (MCA) of full-length**  
1524 **Oskar, the OSK domain and the LOTUS domain.** MCA analysis of trimmed (30%  
1525 occupancy) alignments for (a) full-length Oskar, (b) the OSK domain and (c) the LOTUS  
1526 domain colored by insect order (see legend at right). The alignment was projected onto  
1527 the first three main MCA dimensions (1, 2 and 3). Each dot corresponds to one sequence.  
1528 Dotted line outlines specific families of interest as discussed in the text

1529  
1530 **Supplementary Figure S7: Evolution of the structure of Oskar in Diptera.** Left:  
1531 dipteran phylogeny from (Maddison, et al. 2007; Wiegmann, et al. 2011). Top: schematic  
1532 representation of Oskar domain structure. Blue: heatmap showing the overall occupancy  
1533 of an amino acid position in the Oskar alignment trimmed for at least 10% overall  
1534 occupancy at a given position. For each dipteran family, occupancy at a given position is  
1535 defined as (number of non-gap amino acids / number of sequences in that family). If a 3'  
1536 or 5' extension (defined as a coding sequence unbroken by stop codons, 5' of the first  
1537 residue of the LOTUS domain, or 3' of the last residues of the OSK domain but 5' to a  
1538 predicted poly-A tail) was detected in a family, a black box outlines the putative domain.  
1539 Any such identified 5' domains were designated as putative "Long Oskar" domains.

1540  
1541 **Supplementary Figure S8: Oskar domains secondary structure conservation.**  
1542 Sequence Logo of Jpred4 predictions for LOTUS and OSK domains showing the  
1543 conservation of secondary structures, computed with WebLogo (Crooks, et al. 2004). The  
1544 height of each letter represents that state's (X, H or B) conservation throughout the  
1545 alignment in bits. X (black): unfolded amino acids; H (red):  $\alpha$  helices; E (blue):  $\beta$  sheets.  
1546 **(a)** Prediction for the LOTUS domain. **(b)** Prediction for the OSK domain.

1547  
1548 **Supplementary Figure S9.** Duplications and losses of *oskar* in Hymenoptera. Absence  
1549 (magenta) or presence of *oskar* orthologs detected in single copy (cyan) or multiple  
1550 copies (yellow) in the genomic or transcriptomic datasets examined in this study. Genera  
1551 shown in italics indicate individual species searched and are abbreviated simply for space  
1552 reasons. Genera shown in regular type (not italics) indicate a summary of the results from  
1553 multiple congeneric species, which were nearly always consistent within genera; in all  
1554 cases where intrageneric results for *oskar* presence or absence were inconsistent, we  
1555 gave precedence for the finding obtained from a genome sequence (GCF or GCA) over

1556 findings obtained from a transcriptome (TSA)), o for Hymenoptera species or genera. For  
1557 some species, germ cell specification via germ plasm (black circles) or differentiation from  
1558 mesoderm (no germ plasm; white circles) has been reported in the literature, with primary  
1559 data references indicated by numbers as follows: [1-6]: (Bütschli 1870; Fleig and Sander  
1560 1985, 1986; Zissler 1992; Gutzeit, et al. 1993; Dearden 2006); [7]: (Khila and Abouheif  
1561 2008); [8-10]: (Bull 1982; Lynch and Desplan 2010; Lynch, et al. 2011); [11]: (Koscielska  
1562 and Koscielski 1987); [12-13]: (Silvestri 1906, 1908); [12, 14-21]: (Silvestri 1906; Hegner  
1563 1914; Grbic', et al. 1996; Strand and Grbic' 1997; Grbic' 2000, 2003; Donnell, et al. 2004;  
1564 Zhurov, et al. 2004); [22-25]: (Gatenby 1917a; Gatenby 1917b; Gatenby 1918; Gatenby  
1565 1920); [24]: (Amy 1961); [27-28]: (Gatenby 1920; Tawfik 1957); [29-30]: (Bronskill 1959;  
1566 Fleischmann 1975); [31]: (Shafiq 1954); [32]: (Sumitani, et al. 2003). Phylogenetic  
1567 relationships as per (Nyman, et al. 2006; Field, et al. 2011; Schmidt 2013; Prous, et al.  
1568 2014; Ward 2014; Malm and Nyman 2015; Vilhelmsen 2015; Ward, et al. 2016; Peters,  
1569 et al. 2017; Chen and Achterberg 2018; Peters, et al. 2018; Sharanowski, et al. 2021).  
1570 Evolution of major hymenopteran life history characteristics (eusociality, pollen collecting,  
1571 stinger, parasitoidism) as per (Peters, et al. 2017).  
1572

1573 **Supplementary Figure 1**

1574



1575

1576



1582 **Supplementary Figure 3**  
1583



1584  
1585



1590 **Supplementary Figure 5**  
 1591



1592  
 1593

1594 **Supplementary Figure 6**  
1595

**a. Full-length Oskar**



**b. OSK domain**



**c. LOTUS domain**



1596  
1597

1598 **Supplementary Figure 7**  
1599



1600  
1601

1602 **Supplementary Figure 8**

**a. LOTUS secondary structure conservation**



**b. OSK secondary structure conservation**



1603  
1604

1605 **Supplementary Figure 9**



1606

1607 **Supplementary Table S1**

| <b>Insect Order</b> | <b>Source</b> | <b>Number of datasets searched</b> | <b>Total hits</b> | <b>Filtered hits</b> | <b>% of datasets with <i>oskar</i> identified</b> |
|---------------------|---------------|------------------------------------|-------------------|----------------------|---------------------------------------------------|
| Archaeognatha       | GCA           | 1                                  | 0                 | 0                    | 0                                                 |
| Archaeognatha       | TSA           | 2                                  | 0                 | 0                    | 0                                                 |
| Blattodea           | GCA           | 3                                  | 1                 | 1                    | 33.33                                             |
| Blattodea           | GCF           | 2                                  | 0                 | 0                    | 0                                                 |
| Blattodea           | TSA           | 51                                 | 7                 | 7                    | 13.73                                             |
| Coleoptera          | GCA           | 12                                 | 1                 | 1                    | 8.33                                              |
| Coleoptera          | GCF           | 9                                  | 3                 | 2                    | 22.22                                             |
| Coleoptera          | TSA           | 86                                 | 31                | 14                   | 16.28                                             |
| Collembola          | TSA           | 9                                  | 0                 | 0                    | 0                                                 |
| Dermaptera          | TSA           | 7                                  | 0                 | 0                    | 0                                                 |
| Diptera             | GCA           | 115                                | 63                | 60                   | 52.17                                             |
| Diptera             | GCF           | 43                                 | 58                | 43                   | 100                                               |
| Diptera             | TSA           | 162                                | 72                | 58                   | 35.8                                              |
| Embioptera          | TSA           | 5                                  | 0                 | 0                    | 0                                                 |
| Ephemeroptera       | GCA           | 2                                  | 0                 | 0                    | 0                                                 |
| Ephemeroptera       | TSA           | 5                                  | 1                 | 1                    | 20                                                |
| Grylloblattodea     | TSA           | 2                                  | 0                 | 0                    | 0                                                 |
| Hemiptera           | GCA           | 18                                 | 0                 | 0                    | 0                                                 |
| Hemiptera           | GCF           | 12                                 | 0                 | 0                    | 0                                                 |
| Hemiptera           | TSA           | 192                                | 1                 | 0                    | 0                                                 |
| Hymenoptera         | GCA           | 52                                 | 32                | 30                   | 57.69                                             |
| Hymenoptera         | GCF           | 47                                 | 36                | 32                   | 68.09                                             |
| Hymenoptera         | TSA           | 301                                | 157               | 128                  | 42.52                                             |
| Lepidoptera         | GCA           | 80                                 | 0                 | 0                    | 0                                                 |
| Lepidoptera         | GCF           | 17                                 | 0                 | 0                    | 0                                                 |
| Lepidoptera         | TSA           | 135                                | 24                | 4                    | 2.96                                              |

|                  |     |     |    |   |       |
|------------------|-----|-----|----|---|-------|
| Mantodea         | TSA | 13  | 0  | 0 | 0     |
| Mantophasmatodea | TSA | 2   | 0  | 0 | 0     |
| Mecoptera        | TSA | 4   | 2  | 2 | 50    |
| Megaloptera      | TSA | 3   | 0  | 0 | 0     |
| Neuroptera       | TSA | 7   | 1  | 1 | 14.29 |
| Odonata          | GCA | 2   | 0  | 0 | 0     |
| Odonata          | TSA | 7   | 0  | 0 | 0     |
| Orthoptera       | GCA | 3   | 0  | 0 | 0     |
| Orthoptera       | TSA | 28  | 2  | 2 | 7.14  |
| Phasmatodea      | GCA | 13  | 0  | 0 | 0     |
| Phasmatodea      | TSA | 31  | 6  | 2 | 6.45  |
| Phthiraptera     | GCF | 1   | 0  | 0 | 0     |
| Phthiraptera     | TSA | 7   | 0  | 0 | 0     |
| Plecoptera       | GCA | 3   | 0  | 0 | 0     |
| Plecoptera       | TSA | 8   | 3  | 3 | 37.5  |
| Psocoptera       | TSA | 23  | 5  | 5 | 21.74 |
| Raphidioptera    | TSA | 3   | 0  | 0 | 0     |
| Siphonaptera     | GCF | 1   | 0  | 0 | 0     |
| Siphonaptera     | TSA | 4   | 0  | 0 | 0     |
| Strepsiptera     | GCA | 1   | 0  | 0 | 0     |
| Strepsiptera     | TSA | 2   | 0  | 0 | 0     |
| Thysanoptera     | GCA | 1   | 1  | 1 | 100   |
| Thysanoptera     | GCF | 1   | 1  | 1 | 100   |
| Thysanoptera     | TSA | 11  | 10 | 8 | 72.73 |
| Trichoptera      | GCA | 3   | 1  | 1 | 33.33 |
| Trichoptera      | TSA | 7   | 2  | 2 | 28.57 |
| Zoraptera        | TSA | 2   | 0  | 0 | 0     |
| Zygentoma        | TSA | 4   | 1  | 1 | 25    |
| Crustacea        | TSA | 168 | 0  | 0 | 0     |

|           |     |    |   |   |   |
|-----------|-----|----|---|---|---|
| Crustacea | GCF | 1  | 0 | 0 | 0 |
| Crustacea | GCA | 11 | 0 | 0 | 0 |

1608

1609

1610

1611 **Supplementary Table S2**

1612

|                               | <b>Genome parameter</b> | <b>(a) oskar Identified</b> | <b>(b) oskar not identified</b> | <b>ratio (a):(b)</b> |
|-------------------------------|-------------------------|-----------------------------|---------------------------------|----------------------|
| # contigs                     | mean                    | 255,015                     | 43,280                          | 5.89                 |
|                               | median                  | 69,255                      | 20,653                          | 3.35                 |
| # scaffolds                   | mean                    | 182,706                     | 23,596                          | 7.74                 |
|                               | median                  | 40,960                      | 9,398                           | 4.36                 |
| contig N50 (bp)               | mean                    | 324,036                     | 726,696                         | 0.45                 |
|                               | median                  | 14,052                      | 40,079                          | 0.35                 |
| scaffold N50                  | mean                    | 2,636,825                   | 5,695,299                       | 0.46                 |
|                               | median                  | 96,730                      | 385,460                         | 0.25                 |
| contig L50                    | mean                    | 40,955                      | 3,701                           | 11.07                |
|                               | median                  | 6,868                       | 1,300                           | 5.28                 |
| scaffold L50                  | mean                    | 27,269                      | 1,500                           | 18.18                |
|                               | median                  | 1,131                       | 191                             | 59.53                |
| # contigs per genome length   | mean                    | 0.00060                     | 0.00017                         | 3.53                 |
|                               | median                  | 0.00021                     | 0.00009                         | 2.33                 |
| # scaffolds per genome length | mean                    | 0.00045                     | 0.00009                         | 5.00                 |
|                               | median                  | 0.00013                     | 0.00005                         | 2.60                 |

1613

1614
